# Supplementary material
Source: publisher site journal article supplement (https://www.dovepress.com/get_supplementary_file.php?f=250930.xlsx)
Supplement: Supplementary file 1 [file get_supplementary_file.php]

## Sheet: Supplementary Material - Data
Participants identification number	student's college	Sex	Age	Educational year	Have you ever heard about yellow fever?	from a friend	from health professional	from radio (mass media)	I or/member of my family have been sick/died	from another sick person	Do you know the signs and symptoms of yellow fever?	fever	Head ache	yellowish eye and skin	Muscle and back pain	vomiting blood	loss of appetite	blood mixed diarrhea	Do you know the cause of yellow fever?	If yes what is the cause	Have you ever heard about malaria?	Do you think that there is a difference between yellow fever and malaris	If question number 9 yes,do you think that the causative agent of yel	Is the treatment for malaria different from yellow fever treatment?	Does yellow fever transmit from person to person?	If question number 13 yes, how it does?	If yellow fever is transmitted through mosquitoes bite, do you think	Biting time of mosquitoes which transmit yellow fever?	Have you ever heard that yellow fever can be transmitted from monkeys	Is yellow fever a preventable disease?	Vaccination	Prevent mosquito bite	Spray chemicals arround dormitories	If vaccination (for question number 24), are you vaccinated for yello	Do you think that yellow fever is a major public health issue in your	Do you think that yellow fever occurs inand around Jinka?	Do you think yellow fever affects all age groups (both adult and chil	Do you agree that yellow fever is a fatal/killer disease?	Do you feel that you are at risk of getting yellow fever?	Do you believe that unvaccinated persons are at a high risk of gettin	Do you think that yellow fever is an easily treatable disease?	Do you think that a person who is working/living in a forest area lik	Do you visit/go to a forest/jungle area like around MagoNational Park	If yes, for what purpose do you go to a forest area?	Did you get an orientation/awareness about yellow fever when you join	Did you received a vaccine for yellow fever when you joined JinkaUniv	Born and grown	Age category	Yellowish skin/eye a major sign/symptom of YF
201	SS	1	20	2	1	2	2	2	2	1	1	1	1	2	2	1	2	2	2	#NULL!	1	3	#NULL!	#NULL!	1	3	#NULL!	4	2	1	2	2	1	2	3	1	1	1	3	3	1	1	3	#NULL!	2	2	1	1	0
124	NS	1	20	1	1	2	1	2	2	2	1	1	1	1	1	1	1	1	2	#NULL!	2	#NULL!	#NULL!	#NULL!	1	1	3	3	2	1	1	1	1	2	1	1	3	1	1	1	1	3	2	2	2	2	1	1	1
134	NS	1	20	1	1	2	2	2	1	2	1	2	2	1	2	2	2	2	1	3	1	2	#NULL!	#NULL!	1	1	2	3	2	1	2	1	2	2	2	3	1	1	3	1	1	3	2	3	2	2	2	1	1
69	NS	2	20	2	1	1	2	2	2	2	1	1	1	1	1	2	2	2	1	2	1	3	#NULL!	#NULL!	1	1	2	3	2	1	1	1	1	1	1	3	1	1	3	1	3	2	3	#NULL!	2	1	1	1	1
141	AG	1	22	2	1	1	1	1	2	2	1	1	1	2	1	2	1	2	2	#NULL!	1	3	#NULL!	#NULL!	1	1	2	3	2	1	2	2	1	2	3	3	1	1	2	1	2	3	3	#NULL!	2	2	2	2	0
147	AG	1	23	2	1	2	2	2	1	2	1	2	1	2	2	2	2	2	1	2	1	3	#NULL!	#NULL!	1	1	2	3	2	1	1	2	1	2	2	1	1	1	2	1	2	3	3	#NULL!	2	2	2	2	0
62	NS	2	19	1	1	2	1	2	2	2	1	2	2	1	2	2	2	2	1	2	1	1	1	1	1	1	2	2	2	1	1	2	2	2	2	2	1	1	1	1	1	1	1	1	1	2	2	1	1
237	AG	1	21	2	1	1	1	1	2	2	1	2	2	2	1	1	2	2	1	1	1	3	#NULL!	#NULL!	1	1	2	2	2	3	#NULL!	#NULL!	#NULL!	#NULL!	3	3	3	3	3	3	3	3	1	3	2	2	2	2	0
106	NS	1	19	2	1	2	2	1	1	2	1	2	2	2	1	2	2	2	1	1	1	3	#NULL!	#NULL!	1	1	2	2	2	1	2	2	1	2	3	3	2	3	3	3	3	3	2	3	2	2	2	1	0
216	AG	1	21	2	1	1	2	2	2	2	1	2	2	2	2	2	1	2	1	2	1	1	1	#NULL!	1	1	2	2	2	1	1	2	2	2	1	1	1	1	1	1	1	2	3	#NULL!	2	2	2	2	0
113	NS	2	19	1	1	2	1	2	2	2	1	1	1	1	2	2	2	2	2	#NULL!	1	1	1	1	1	1	2	2	2	1	1	2	2	2	2	2	1	1	1	1	1	1	3	#NULL!	2	2	2	1	1
211	SS	2	20	1	1	2	1	2	2	2	1	2	2	1	2	2	2	2	1	2	1	1	1	1	1	1	2	2	2	1	1	2	2	2	2	2	1	1	1	1	1	1	3	#NULL!	1	2	2	1	1
83	NS	1	23	2	1	2	1	2	2	2	1	2	2	1	2	1	2	2	1	1	1	1	1	1	1	1	2	2	1	1	1	2	2	2	1	1	1	1	1	1	1	1	3	#NULL!	2	2	2	2	1
128	NS	2	19	1	1	1	1	1	2	2	1	1	2	2	2	2	2	1	1	2	1	3	#NULL!	#NULL!	1	1	2	2	2	2	#NULL!	#NULL!	#NULL!	#NULL!	3	3	3	3	3	3	3	2	3	#NULL!	1	2	2	1	1
243	AG	1	21	2	1	2	2	1	2	2	2	#NULL!	#NULL!	#NULL!	#NULL!	#NULL!	#NULL!	#NULL!	1	2	1	1	1	1	1	2	#NULL!	2	2	1	2	2	1	2	1	1	1	1	1	2	1	1	3	#NULL!	2	2	2	2	0
142	AG	1	20	2	1	1	1	2	2	2	1	1	1	2	2	1	1	2	1	2	1	1	1	1	1	4	#NULL!	2	2	1	1	2	2	2	1	1	1	1	2	2	1	2	3	#NULL!	2	2	2	1	0
73	NS	1	21	2	1	2	2	1	2	2	1	2	2	1	2	2	2	2	1	2	1	1	1	1	1	1	2	1	1	3	#NULL!	#NULL!	#NULL!	#NULL!	1	1	2	1	2	1	1	1	1	1	1	2	2	2	1
191	SS	1	23	2	1	2	2	1	2	2	1	2	2	1	2	2	2	2	1	2	1	1	1	1	1	4	#NULL!	1	2	1	1	2	2	1	1	1	1	1	1	1	2	1	3	#NULL!	2	1	1	2	1
193	SS	1	22	2	1	2	2	1	2	2	1	2	2	1	2	2	2	2	1	2	1	1	1	1	1	4	#NULL!	1	2	1	1	2	2	1	1	1	1	1	1	2	1	2	3	#NULL!	2	1	1	2	1
188	SS	1	20	1	1	2	2	1	2	2	1	2	2	1	2	2	2	2	1	2	1	1	1	1	1	4	#NULL!	1	2	1	1	2	2	2	1	1	1	1	1	1	1	1	3	#NULL!	2	2	2	1	1
302	AG	1	20	2	1	2	1	2	2	2	1	2	1	2	2	2	2	2	1	1	1	1	1	1	1	1	3	#NULL!	1	1	1	2	2	2	1	1	1	1	1	1	1	1	1	2	1	2	2	1	0
247	AG	1	25	2	1	2	1	1	2	2	1	2	2	2	1	2	2	2	1	2	1	3	#NULL!	#NULL!	1	1	3	#NULL!	2	1	2	2	1	2	3	3	3	3	3	3	3	3	3	#NULL!	1	2	2	2	0
259	AG	2	20	1	1	1	2	2	2	2	1	2	2	1	2	2	2	2	2	#NULL!	1	2	#NULL!	#NULL!	1	1	3	#NULL!	2	1	2	2	1	2	3	3	3	3	3	3	3	3	3	#NULL!	2	2	2	1	1
169	SS	2	19	1	1	2	1	2	2	2	2	#NULL!	#NULL!	#NULL!	#NULL!	#NULL!	#NULL!	#NULL!	2	#NULL!	1	2	#NULL!	#NULL!	1	1	3	#NULL!	2	1	1	2	2	2	3	3	3	1	1	1	1	1	3	#NULL!	2	2	2	1	0
5	BE	2	20	1	1	2	2	2	1	2	1	2	2	2	1	2	2	2	2	#NULL!	1	1	1	3	1	1	2	#NULL!	2	1	1	2	2	2	1	3	1	1	1	2	3	3	3	#NULL!	2	2	2	1	0
179	SS	2	21	2	1	2	2	2	2	1	1	1	1	2	2	2	2	2	1	2	1	3	#NULL!	#NULL!	1	1	3	#NULL!	1	1	1	1	2	2	3	3	1	1	3	3	1	3	3	#NULL!	2	2	2	2	0
16	BE	1	22	2	1	2	1	1	2	2	1	2	1	1	2	2	2	2	1	1	1	1	1	1	1	1	3	#NULL!	2	1	1	2	2	2	1	1	1	1	1	1	1	1	3	#NULL!	2	2	2	2	1
26	BE	1	20	2	1	1	2	2	2	2	1	2	1	2	2	2	2	2	1	1	2	#NULL!	#NULL!	#NULL!	1	1	3	#NULL!	2	2	#NULL!	#NULL!	#NULL!	#NULL!	2	1	1	2	3	2	1	3	3	#NULL!	2	2	2	1	0
189	SS	1	19	2	1	2	1	2	2	2	1	2	2	1	2	2	2	2	1	1	1	1	1	1	1	1	1	#NULL!	2	1	1	1	2	1	3	1	1	1	1	1	2	1	1	2	1	1	1	1	1
44	BE	1	22	2	1	2	1	2	2	2	1	1	1	1	1	2	1	2	1	3	1	2	#NULL!	#NULL!	1	1	1	#NULL!	2	1	1	1	1	2	1	1	1	1	2	1	1	1	1	4	2	2	2	2	1
190	SS	1	20	2	1	2	1	1	2	2	1	1	1	2	2	2	2	2	1	1	1	1	1	#NULL!	1	1	1	#NULL!	1	1	1	2	2	2	1	1	1	1	1	1	1	1	1	1	1	2	2	1	0
156	AG	1	19	2	1	1	2	2	2	2	1	1	2	2	2	2	2	2	1	2	1	2	#NULL!	#NULL!	1	1	1	#NULL!	1	2	#NULL!	#NULL!	#NULL!	#NULL!	1	2	1	1	2	1	1	2	1	1	1	2	2	1	0
200	SS	1	22	2	1	2	2	2	2	1	1	2	1	1	2	2	1	2	1	2	1	3	#NULL!	#NULL!	1	1	1	#NULL!	2	1	2	2	1	2	3	1	1	1	1	3	1	1	2	2	2	2	1	2	1
29	BE	1	20	1	1	1	2	2	2	2	1	1	2	2	2	2	2	2	1	1	1	2	#NULL!	#NULL!	1	1	1	#NULL!	2	1	2	1	2	#NULL!	1	3	1	1	2	3	2	3	2	3	2	2	2	1	0
317	AG	1	23	2	1	1	2	2	2	2	1	2	2	1	2	2	2	2	1	2	1	3	#NULL!	#NULL!	1	1	1	#NULL!	2	1	2	2	1	2	3	3	1	1	1	1	1	1	2	2	2	2	2	2	1
314	AG	1	20	2	1	2	2	1	2	2	2	#NULL!	#NULL!	#NULL!	#NULL!	#NULL!	#NULL!	#NULL!	1	2	1	1	1	1	1	1	1	#NULL!	2	1	2	2	1	2	2	1	1	2	1	2	1	1	2	2	1	2	2	1	0
313	AG	1	20	2	1	2	1	2	2	2	1	2	1	2	2	2	2	2	1	2	1	1	1	2	1	1	1	#NULL!	2	1	2	2	1	2	1	1	1	1	2	1	1	1	2	4	1	2	2	1	0
123	NS	1	20	2	1	2	1	2	2	2	1	1	1	1	1	1	1	1	2	#NULL!	2	#NULL!	#NULL!	#NULL!	1	1	1	#NULL!	2	1	1	1	1	2	1	1	3	1	2	1	1	3	2	2	2	2	2	1	1
158	AG	1	21	2	1	1	2	1	2	2	1	1	2	2	2	1	2	2	1	2	1	1	1	1	1	1	1	#NULL!	2	1	1	2	2	2	1	1	1	1	1	1	1	1	2	3	2	2	2	2	0
250	AG	1	23	1	1	1	2	1	2	2	1	2	1	2	2	1	2	2	1	2	1	1	1	1	1	1	1	#NULL!	2	1	1	2	2	2	1	1	1	1	1	1	1	1	2	3	2	2	2	2	0
320	AG	1	21	2	1	1	2	2	2	1	1	1	1	2	1	2	2	2	1	3	1	2	#NULL!	#NULL!	1	1	1	#NULL!	1	1	1	2	2	2	1	1	1	1	1	1	1	1	2	1	1	2	2	2	0
181	SS	1	23	2	1	1	1	1	2	1	1	1	1	1	1	1	1	2	1	1	1	1	1	2	1	1	1	#NULL!	1	1	2	2	1	2	1	1	1	1	1	1	2	1	2	3	2	2	2	2	1
288	AG	2	20	2	1	1	2	2	2	2	1	2	1	2	2	2	2	2	1	2	1	1	1	1	1	1	1	#NULL!	1	1	1	2	2	2	1	1	1	1	1	2	1	2	2	1	1	2	2	1	0
321	AG	1	21	2	1	2	2	2	2	1	1	1	2	2	2	2	2	2	1	3	1	1	1	1	1	1	1	#NULL!	1	1	1	2	2	2	1	1	1	1	1	1	1	1	2	1	1	2	2	2	0
194	SS	1	20	2	1	2	1	1	2	2	1	1	1	1	2	1	2	2	1	1	1	1	2	#NULL!	1	1	1	#NULL!	1	1	1	2	1	2	1	1	1	1	2	1	1	1	2	3	2	2	2	1	1
46	BE	1	20	2	1	1	2	2	2	2	1	2	1	2	2	2	2	2	2	#NULL!	1	2	#NULL!	#NULL!	1	1	1	#NULL!	1	1	2	1	2	1	1	1	1	1	1	1	1	3	3	#NULL!	1	1	1	1	0
20	BE	1	20	2	1	2	2	1	2	2	1	1	2	2	2	2	2	2	1	1	1	2	#NULL!	#NULL!	1	1	1	#NULL!	2	1	1	2	2	1	2	2	2	1	1	1	1	2	3	#NULL!	2	1	1	1	0
176	SS	2	20	2	1	2	2	2	1	2	1	2	1	1	2	2	1	2	1	1	1	1	1	1	1	1	1	#NULL!	2	1	1	1	2	1	2	1	1	1	1	1	1	3	3	#NULL!	2	1	1	1	1
145	AG	1	21	2	1	1	2	2	2	2	1	2	1	2	2	2	2	2	1	2	1	2	#NULL!	#NULL!	1	1	1	#NULL!	2	1	2	1	2	2	3	1	1	1	2	1	1	3	3	#NULL!	2	2	2	2	0
311	AG	1	20	1	1	2	1	1	2	2	1	2	2	2	1	2	2	2	1	1	1	3	#NULL!	#NULL!	1	1	1	#NULL!	2	1	2	2	1	2	3	3	3	3	3	3	3	3	3	#NULL!	2	2	2	1	0
245	AG	1	20	2	1	2	1	1	2	1	1	1	1	1	1	2	1	2	1	1	1	3	#NULL!	#NULL!	1	1	1	#NULL!	2	1	2	2	1	2	1	1	1	1	3	1	1	1	3	#NULL!	2	2	2	1	1
260	AG	2	19	1	1	1	1	1	2	1	1	1	1	1	1	2	1	2	2	#NULL!	1	3	#NULL!	#NULL!	1	1	1	#NULL!	2	1	2	1	1	2	2	1	1	1	2	1	2	1	3	#NULL!	2	2	2	1	1
143	AG	2	20	2	1	1	2	2	2	2	2	#NULL!	#NULL!	#NULL!	#NULL!	#NULL!	#NULL!	#NULL!	1	2	1	1	3	#NULL!	1	1	1	#NULL!	2	1	2	2	1	2	1	1	1	1	1	1	1	1	3	#NULL!	2	2	2	1	0
234	AG	1	20	2	1	2	2	1	2	2	2	#NULL!	#NULL!	#NULL!	#NULL!	#NULL!	#NULL!	#NULL!	1	2	1	1	1	1	1	1	1	#NULL!	2	1	2	2	1	2	1	1	1	1	1	2	1	1	3	#NULL!	1	2	2	1	0
246	AG	1	21	2	1	2	2	1	2	2	2	#NULL!	#NULL!	#NULL!	#NULL!	#NULL!	#NULL!	#NULL!	1	2	1	1	3	#NULL!	1	1	1	#NULL!	2	1	2	1	2	2	1	3	1	1	1	2	1	3	3	#NULL!	2	2	2	2	0
185	SS	1	20	1	1	1	2	2	2	2	1	1	2	2	2	2	2	2	1	2	2	#NULL!	#NULL!	#NULL!	1	1	1	#NULL!	2	1	1	2	2	2	1	1	1	2	2	1	1	2	3	#NULL!	2	2	2	1	0
1	BE	2	22	2	1	2	2	1	2	2	1	1	2	2	2	2	2	2	2	#NULL!	1	3	#NULL!	#NULL!	1	1	1	#NULL!	2	1	1	2	2	2	1	1	1	2	2	3	1	3	3	#NULL!	1	2	2	2	0
144	AG	1	20	2	1	2	2	2	2	1	1	1	2	2	2	2	2	2	1	2	1	2	#NULL!	#NULL!	1	1	1	#NULL!	2	1	1	2	2	2	2	1	1	1	1	1	1	2	3	#NULL!	2	2	2	1	0
32	BE	1	23	2	1	2	1	2	2	2	1	2	2	1	2	2	2	2	1	2	1	1	1	1	1	1	1	#NULL!	2	1	2	2	1	2	1	1	1	1	1	2	1	3	3	#NULL!	2	2	2	2	1
104	NS	1	19	2	1	2	1	2	2	2	1	2	2	1	2	2	2	2	1	2	1	1	1	1	1	1	1	#NULL!	2	1	2	1	2	2	1	2	1	1	1	1	2	1	3	#NULL!	2	2	2	1	1
316	AG	1	21	2	1	2	2	1	2	2	1	1	1	1	1	2	1	2	1	1	1	1	1	1	1	1	1	#NULL!	2	1	2	2	1	2	2	3	1	1	2	3	2	2	3	#NULL!	2	2	2	2	1
45	BE	1	25	2	1	2	1	1	1	2	1	1	1	1	1	1	1	2	1	1	1	2	#NULL!	#NULL!	1	1	1	#NULL!	1	1	2	1	2	2	1	1	1	1	1	1	1	3	3	#NULL!	2	2	2	2	1
195	SS	1	20	1	1	2	1	2	2	1	1	1	1	1	1	1	1	1	1	1	1	2	#NULL!	#NULL!	1	1	1	#NULL!	1	1	2	1	2	2	1	1	1	1	2	1	1	1	3	#NULL!	2	2	2	1	1
308	AG	1	23	2	1	1	1	1	1	2	1	1	1	1	1	2	1	2	1	1	1	2	#NULL!	#NULL!	1	1	1	#NULL!	1	1	2	1	2	2	1	1	1	3	1	1	1	1	3	#NULL!	2	2	2	2	1
157	AG	1	23	2	1	2	1	2	2	2	2	#NULL!	#NULL!	#NULL!	#NULL!	#NULL!	#NULL!	#NULL!	2	#NULL!	1	1	1	1	1	1	1	#NULL!	1	1	2	2	1	2	1	1	1	1	1	1	1	1	3	#NULL!	1	2	2	2	0
227	AG	2	20	2	1	2	2	2	2	1	1	1	1	1	2	2	1	2	1	2	2	#NULL!	#NULL!	#NULL!	1	1	1	#NULL!	2	1	1	1	1	2	1	3	1	3	3	1	3	3	3	#NULL!	2	2	2	1	1
55	BE	1	20	2	1	2	1	1	2	2	2	#NULL!	#NULL!	#NULL!	#NULL!	#NULL!	#NULL!	#NULL!	1	2	1	1	1	1	1	1	1	#NULL!	2	1	1	1	1	2	1	2	1	1	1	1	1	2	3	#NULL!	1	2	2	1	0
61	NS	2	19	2	1	2	2	1	2	2	1	1	1	2	2	2	2	2	1	3	1	1	2	#NULL!	1	1	1	#NULL!	2	1	1	1	1	2	1	1	1	1	1	1	1	1	3	#NULL!	2	2	2	1	0
183	AG	1	23	1	1	1	2	2	2	2	1	1	2	2	2	2	2	2	1	2	1	1	1	#NULL!	1	1	1	#NULL!	2	1	1	2	2	2	1	1	1	1	1	1	1	1	3	#NULL!	2	2	2	2	0
184	SS	1	24	2	1	1	2	2	2	2	1	1	2	2	2	2	2	2	1	2	1	1	1	2	1	1	1	#NULL!	2	1	1	2	2	2	1	1	1	1	1	1	1	3	3	#NULL!	2	2	2	2	0
91	NS	2	21	2	1	2	2	1	2	2	1	2	1	2	2	2	2	2	1	2	1	3	#NULL!	#NULL!	1	1	1	#NULL!	1	1	1	1	2	2	3	1	1	1	1	1	2	1	3	#NULL!	2	2	2	2	0
65	NS	1	24	1	1	1	1	2	2	2	1	1	1	1	1	1	2	2	1	1	1	1	1	#NULL!	1	1	1	#NULL!	1	1	2	1	2	2	1	1	1	1	1	1	1	3	3	#NULL!	2	2	2	2	1
42	BE	1	20	1	1	2	1	1	2	2	1	1	1	1	1	2	1	2	1	2	1	1	1	1	1	1	1	#NULL!	2	1	1	1	1	2	1	1	1	1	1	1	1	1	3	#NULL!	1	2	2	1	1
204	SS	2	19	1	1	2	1	2	2	2	1	2	2	1	2	2	2	2	1	2	1	1	1	1	1	1	1	#NULL!	2	1	1	2	2	2	2	2	1	1	1	1	1	1	3	#NULL!	1	2	2	1	1
222	AG	1	20	2	1	2	1	2	2	2	1	2	1	2	2	2	2	2	1	2	1	1	1	1	1	1	1	#NULL!	1	1	1	2	2	2	1	1	1	2	1	1	1	1	3	#NULL!	2	2	2	1	0
21	BE	1	27	2	1	2	1	1	2	1	1	1	1	1	2	2	1	2	1	2	1	1	1	1	1	1	1	#NULL!	1	1	1	1	1	2	1	3	1	1	1	1	1	1	3	#NULL!	2	2	2	2	1
54	BE	1	20	2	1	2	1	1	2	2	1	1	1	1	2	2	1	2	1	2	1	1	1	1	1	1	1	#NULL!	1	1	1	1	2	2	1	1	1	1	1	1	1	1	3	#NULL!	1	2	2	1	1
56	BE	1	20	2	1	1	1	1	1	1	1	1	1	1	1	2	1	2	1	2	1	1	1	1	1	1	1	#NULL!	1	1	1	1	1	2	1	1	1	1	1	1	1	1	3	#NULL!	2	2	2	1	1
305	AG	1	20	2	1	1	1	2	2	1	1	1	2	1	2	2	1	2	1	2	1	1	1	1	1	1	1	#NULL!	1	1	1	2	2	2	1	1	1	1	3	3	1	3	3	#NULL!	2	2	2	1	1
121	NS	1	24	2	1	2	1	2	2	2	1	2	2	1	2	2	2	2	1	3	1	2	#NULL!	#NULL!	1	1	1	#NULL!	2	2	#NULL!	#NULL!	#NULL!	#NULL!	1	1	1	1	1	1	2	3	3	#NULL!	1	2	2	2	1
301	AG	1	20	2	1	2	2	2	1	2	1	2	2	1	2	2	2	2	1	2	1	1	1	3	1	1	1	#NULL!	2	2	#NULL!	#NULL!	#NULL!	#NULL!	1	1	2	2	2	3	1	1	3	#NULL!	1	2	2	1	1
251	AG	1	20	2	1	2	2	1	2	2	1	2	2	2	2	2	2	1	1	1	2	#NULL!	#NULL!	#NULL!	1	1	1	#NULL!	2	3	#NULL!	#NULL!	#NULL!	#NULL!	2	1	1	1	2	1	3	1	3	#NULL!	2	2	2	1	1
13	BE	2	21	1	1	1	1	1	2	2	1	2	1	1	1	2	1	2	1	1	1	3	#NULL!	#NULL!	1	1	1	#NULL!	2	3	#NULL!	#NULL!	#NULL!	#NULL!	1	1	1	1	3	3	3	3	3	#NULL!	2	2	2	2	1
219	AG	1	20	2	1	2	1	1	2	2	1	1	1	1	2	1	1	2	1	1	1	3	#NULL!	#NULL!	1	1	1	#NULL!	2	3	#NULL!	#NULL!	#NULL!	#NULL!	3	1	1	1	2	3	3	1	3	#NULL!	2	2	2	1	1
88	NS	2	20	2	1	1	2	2	2	2	1	1	2	2	1	1	1	2	1	1	1	1	1	1	1	1	1	#NULL!	2	3	#NULL!	#NULL!	#NULL!	#NULL!	1	1	1	1	1	1	3	3	3	#NULL!	2	2	2	1	0
117	NS	2	20	2	1	2	2	2	2	1	1	1	1	2	2	1	1	2	1	2	1	1	1	1	1	1	1	#NULL!	2	3	#NULL!	#NULL!	#NULL!	#NULL!	3	3	3	3	3	3	3	3	3	#NULL!	2	2	2	1	0
137	AG	1	22	2	1	1	1	1	2	2	1	1	1	1	2	2	2	2	1	1	1	1	1	#NULL!	1	1	1	#NULL!	2	3	#NULL!	#NULL!	#NULL!	#NULL!	1	1	1	1	1	1	1	3	3	#NULL!	2	2	2	2	1
166	SS	2	19	2	1	2	1	2	2	2	1	2	2	2	2	2	1	2	1	1	1	1	1	#NULL!	1	2	#NULL!	#NULL!	2	1	2	2	1	2	2	1	1	1	1	1	1	3	3	#NULL!	2	2	2	1	0
241	AG	1	21	2	1	2	2	1	2	2	1	1	1	2	2	1	1	2	1	2	1	1	1	1	1	3	#NULL!	#NULL!	2	1	1	2	1	2	2	2	1	1	2	2	1	1	3	#NULL!	1	2	2	2	0
23	BE	1	20	2	2	#NULL!	#NULL!	#NULL!	#NULL!	#NULL!	#NULL!	#NULL!	#NULL!	#NULL!	#NULL!	#NULL!	#NULL!	#NULL!	#NULL!	#NULL!	#NULL!	#NULL!	#NULL!	#NULL!	#NULL!	#NULL!	#NULL!	#NULL!	#NULL!	#NULL!	#NULL!	#NULL!	#NULL!	#NULL!	#NULL!	#NULL!	#NULL!	#NULL!	#NULL!	#NULL!	#NULL!	#NULL!	#NULL!	#NULL!	#NULL!	#NULL!	2	1	0
24	BE	2	21	2	2	#NULL!	#NULL!	#NULL!	#NULL!	#NULL!	#NULL!	#NULL!	#NULL!	#NULL!	#NULL!	#NULL!	#NULL!	#NULL!	#NULL!	#NULL!	#NULL!	#NULL!	#NULL!	#NULL!	#NULL!	#NULL!	#NULL!	#NULL!	#NULL!	#NULL!	#NULL!	#NULL!	#NULL!	#NULL!	#NULL!	#NULL!	#NULL!	#NULL!	#NULL!	#NULL!	#NULL!	#NULL!	#NULL!	#NULL!	#NULL!	#NULL!	2	2	0
25	BE	2	25	1	2	#NULL!	#NULL!	#NULL!	#NULL!	#NULL!	#NULL!	#NULL!	#NULL!	#NULL!	#NULL!	#NULL!	#NULL!	#NULL!	#NULL!	#NULL!	#NULL!	#NULL!	#NULL!	#NULL!	#NULL!	#NULL!	#NULL!	#NULL!	#NULL!	#NULL!	#NULL!	#NULL!	#NULL!	#NULL!	#NULL!	#NULL!	#NULL!	#NULL!	#NULL!	#NULL!	#NULL!	#NULL!	#NULL!	#NULL!	#NULL!	#NULL!	2	2	0
48	BE	1	27	1	2	#NULL!	#NULL!	#NULL!	#NULL!	#NULL!	#NULL!	#NULL!	#NULL!	#NULL!	#NULL!	#NULL!	#NULL!	#NULL!	#NULL!	#NULL!	#NULL!	#NULL!	#NULL!	#NULL!	#NULL!	#NULL!	#NULL!	#NULL!	#NULL!	#NULL!	#NULL!	#NULL!	#NULL!	#NULL!	#NULL!	#NULL!	#NULL!	#NULL!	#NULL!	#NULL!	#NULL!	#NULL!	#NULL!	#NULL!	#NULL!	#NULL!	2	2	0
52	BE	2	20	1	2	#NULL!	#NULL!	#NULL!	#NULL!	#NULL!	#NULL!	#NULL!	#NULL!	#NULL!	#NULL!	#NULL!	#NULL!	#NULL!	#NULL!	#NULL!	#NULL!	#NULL!	#NULL!	#NULL!	#NULL!	#NULL!	#NULL!	#NULL!	#NULL!	#NULL!	#NULL!	#NULL!	#NULL!	#NULL!	#NULL!	#NULL!	#NULL!	#NULL!	#NULL!	#NULL!	#NULL!	#NULL!	#NULL!	#NULL!	#NULL!	#NULL!	2	1	0
58	NS	2	20	1	2	#NULL!	#NULL!	#NULL!	#NULL!	#NULL!	#NULL!	#NULL!	#NULL!	#NULL!	#NULL!	#NULL!	#NULL!	#NULL!	#NULL!	#NULL!	#NULL!	#NULL!	#NULL!	#NULL!	#NULL!	#NULL!	#NULL!	#NULL!	#NULL!	#NULL!	#NULL!	#NULL!	#NULL!	#NULL!	#NULL!	#NULL!	#NULL!	#NULL!	#NULL!	#NULL!	#NULL!	#NULL!	#NULL!	#NULL!	#NULL!	#NULL!	2	1	0
64	NS	1	20	1	2	#NULL!	#NULL!	#NULL!	#NULL!	#NULL!	#NULL!	#NULL!	#NULL!	#NULL!	#NULL!	#NULL!	#NULL!	#NULL!	#NULL!	#NULL!	#NULL!	#NULL!	#NULL!	#NULL!	#NULL!	#NULL!	#NULL!	#NULL!	#NULL!	#NULL!	#NULL!	#NULL!	#NULL!	#NULL!	#NULL!	#NULL!	#NULL!	#NULL!	#NULL!	#NULL!	#NULL!	#NULL!	#NULL!	#NULL!	#NULL!	#NULL!	2	1	0
74	NS	1	19	1	2	#NULL!	#NULL!	#NULL!	#NULL!	#NULL!	#NULL!	#NULL!	#NULL!	#NULL!	#NULL!	#NULL!	#NULL!	#NULL!	#NULL!	#NULL!	#NULL!	#NULL!	#NULL!	#NULL!	#NULL!	#NULL!	#NULL!	#NULL!	#NULL!	#NULL!	#NULL!	#NULL!	#NULL!	#NULL!	#NULL!	#NULL!	#NULL!	#NULL!	#NULL!	#NULL!	#NULL!	#NULL!	#NULL!	#NULL!	#NULL!	#NULL!	2	1	0
78	NS	2	19	1	2	#NULL!	#NULL!	#NULL!	#NULL!	#NULL!	#NULL!	#NULL!	#NULL!	#NULL!	#NULL!	#NULL!	#NULL!	#NULL!	#NULL!	#NULL!	#NULL!	#NULL!	#NULL!	#NULL!	#NULL!	#NULL!	#NULL!	#NULL!	#NULL!	#NULL!	#NULL!	#NULL!	#NULL!	#NULL!	#NULL!	#NULL!	#NULL!	#NULL!	#NULL!	#NULL!	#NULL!	#NULL!	#NULL!	#NULL!	#NULL!	#NULL!	2	1	0
79	NS	2	20	1	2	#NULL!	#NULL!	#NULL!	#NULL!	#NULL!	#NULL!	#NULL!	#NULL!	#NULL!	#NULL!	#NULL!	#NULL!	#NULL!	#NULL!	#NULL!	#NULL!	#NULL!	#NULL!	#NULL!	#NULL!	#NULL!	#NULL!	#NULL!	#NULL!	#NULL!	#NULL!	#NULL!	#NULL!	#NULL!	#NULL!	#NULL!	#NULL!	#NULL!	#NULL!	#NULL!	#NULL!	#NULL!	#NULL!	#NULL!	#NULL!	#NULL!	2	1	0
99	NS	1	22	2	2	#NULL!	#NULL!	#NULL!	#NULL!	#NULL!	#NULL!	#NULL!	#NULL!	#NULL!	#NULL!	#NULL!	#NULL!	#NULL!	#NULL!	#NULL!	#NULL!	#NULL!	#NULL!	#NULL!	#NULL!	#NULL!	#NULL!	#NULL!	#NULL!	#NULL!	#NULL!	#NULL!	#NULL!	#NULL!	#NULL!	#NULL!	#NULL!	#NULL!	#NULL!	#NULL!	#NULL!	#NULL!	#NULL!	#NULL!	#NULL!	#NULL!	2	2	0
102	NS	1	21	2	2	#NULL!	#NULL!	#NULL!	#NULL!	#NULL!	#NULL!	#NULL!	#NULL!	#NULL!	#NULL!	#NULL!	#NULL!	#NULL!	#NULL!	#NULL!	#NULL!	#NULL!	#NULL!	#NULL!	#NULL!	#NULL!	#NULL!	#NULL!	#NULL!	#NULL!	#NULL!	#NULL!	#NULL!	#NULL!	#NULL!	#NULL!	#NULL!	#NULL!	#NULL!	#NULL!	#NULL!	#NULL!	#NULL!	#NULL!	#NULL!	#NULL!	2	2	0
107	NS	1	21	1	2	#NULL!	#NULL!	#NULL!	#NULL!	#NULL!	#NULL!	#NULL!	#NULL!	#NULL!	#NULL!	#NULL!	#NULL!	#NULL!	#NULL!	#NULL!	#NULL!	#NULL!	#NULL!	#NULL!	#NULL!	#NULL!	#NULL!	#NULL!	#NULL!	#NULL!	#NULL!	#NULL!	#NULL!	#NULL!	#NULL!	#NULL!	#NULL!	#NULL!	#NULL!	#NULL!	#NULL!	#NULL!	#NULL!	#NULL!	#NULL!	#NULL!	2	2	0
108	NS	2	20	1	2	#NULL!	#NULL!	#NULL!	#NULL!	#NULL!	#NULL!	#NULL!	#NULL!	#NULL!	#NULL!	#NULL!	#NULL!	#NULL!	#NULL!	#NULL!	#NULL!	#NULL!	#NULL!	#NULL!	#NULL!	#NULL!	#NULL!	#NULL!	#NULL!	#NULL!	#NULL!	#NULL!	#NULL!	#NULL!	#NULL!	#NULL!	#NULL!	#NULL!	#NULL!	#NULL!	#NULL!	#NULL!	#NULL!	#NULL!	#NULL!	#NULL!	2	1	0
109	NS	2	20	1	2	#NULL!	#NULL!	#NULL!	#NULL!	#NULL!	#NULL!	#NULL!	#NULL!	#NULL!	#NULL!	#NULL!	#NULL!	#NULL!	#NULL!	#NULL!	#NULL!	#NULL!	#NULL!	#NULL!	#NULL!	#NULL!	#NULL!	#NULL!	#NULL!	#NULL!	#NULL!	#NULL!	#NULL!	#NULL!	#NULL!	#NULL!	#NULL!	#NULL!	#NULL!	#NULL!	#NULL!	#NULL!	#NULL!	#NULL!	#NULL!	#NULL!	2	1	0
116	NS	2	19	1	2	#NULL!	#NULL!	#NULL!	#NULL!	#NULL!	#NULL!	#NULL!	#NULL!	#NULL!	#NULL!	#NULL!	#NULL!	#NULL!	#NULL!	#NULL!	#NULL!	#NULL!	#NULL!	#NULL!	#NULL!	#NULL!	#NULL!	#NULL!	#NULL!	#NULL!	#NULL!	#NULL!	#NULL!	#NULL!	#NULL!	#NULL!	#NULL!	#NULL!	#NULL!	#NULL!	#NULL!	#NULL!	#NULL!	#NULL!	#NULL!	#NULL!	2	1	0
120	NS	1	20	1	2	#NULL!	#NULL!	#NULL!	#NULL!	#NULL!	#NULL!	#NULL!	#NULL!	#NULL!	#NULL!	#NULL!	#NULL!	#NULL!	#NULL!	#NULL!	#NULL!	#NULL!	#NULL!	#NULL!	#NULL!	#NULL!	#NULL!	#NULL!	#NULL!	#NULL!	#NULL!	#NULL!	#NULL!	#NULL!	#NULL!	#NULL!	#NULL!	#NULL!	#NULL!	#NULL!	#NULL!	#NULL!	#NULL!	#NULL!	#NULL!	#NULL!	2	1	0
125	NS	2	20	1	2	#NULL!	#NULL!	#NULL!	#NULL!	#NULL!	#NULL!	#NULL!	#NULL!	#NULL!	#NULL!	#NULL!	#NULL!	#NULL!	#NULL!	#NULL!	#NULL!	#NULL!	#NULL!	#NULL!	#NULL!	#NULL!	#NULL!	#NULL!	#NULL!	#NULL!	#NULL!	#NULL!	#NULL!	#NULL!	#NULL!	#NULL!	#NULL!	#NULL!	#NULL!	#NULL!	#NULL!	#NULL!	#NULL!	#NULL!	#NULL!	#NULL!	2	1	0
140	AG	1	20	1	2	#NULL!	#NULL!	#NULL!	#NULL!	#NULL!	#NULL!	#NULL!	#NULL!	#NULL!	#NULL!	#NULL!	#NULL!	#NULL!	#NULL!	#NULL!	#NULL!	#NULL!	#NULL!	#NULL!	#NULL!	#NULL!	#NULL!	#NULL!	#NULL!	#NULL!	#NULL!	#NULL!	#NULL!	#NULL!	#NULL!	#NULL!	#NULL!	#NULL!	#NULL!	#NULL!	#NULL!	#NULL!	#NULL!	#NULL!	#NULL!	#NULL!	2	1	0
151	AG	1	22	1	2	#NULL!	#NULL!	#NULL!	#NULL!	#NULL!	#NULL!	#NULL!	#NULL!	#NULL!	#NULL!	#NULL!	#NULL!	#NULL!	#NULL!	#NULL!	#NULL!	#NULL!	#NULL!	#NULL!	#NULL!	#NULL!	#NULL!	#NULL!	#NULL!	#NULL!	#NULL!	#NULL!	#NULL!	#NULL!	#NULL!	#NULL!	#NULL!	#NULL!	#NULL!	#NULL!	#NULL!	#NULL!	#NULL!	#NULL!	#NULL!	#NULL!	2	2	0
154	AG	1	20	1	2	#NULL!	#NULL!	#NULL!	#NULL!	#NULL!	#NULL!	#NULL!	#NULL!	#NULL!	#NULL!	#NULL!	#NULL!	#NULL!	#NULL!	#NULL!	#NULL!	#NULL!	#NULL!	#NULL!	#NULL!	#NULL!	#NULL!	#NULL!	#NULL!	#NULL!	#NULL!	#NULL!	#NULL!	#NULL!	#NULL!	#NULL!	#NULL!	#NULL!	#NULL!	#NULL!	#NULL!	#NULL!	#NULL!	#NULL!	#NULL!	#NULL!	2	1	0
161	SS	2	19	1	2	#NULL!	#NULL!	#NULL!	#NULL!	#NULL!	#NULL!	#NULL!	#NULL!	#NULL!	#NULL!	#NULL!	#NULL!	#NULL!	#NULL!	#NULL!	#NULL!	#NULL!	#NULL!	#NULL!	#NULL!	#NULL!	#NULL!	#NULL!	#NULL!	#NULL!	#NULL!	#NULL!	#NULL!	#NULL!	#NULL!	#NULL!	#NULL!	#NULL!	#NULL!	#NULL!	#NULL!	#NULL!	#NULL!	#NULL!	#NULL!	#NULL!	2	1	0
164	SS	1	24	2	2	#NULL!	#NULL!	#NULL!	#NULL!	#NULL!	#NULL!	#NULL!	#NULL!	#NULL!	#NULL!	#NULL!	#NULL!	#NULL!	#NULL!	#NULL!	#NULL!	#NULL!	#NULL!	#NULL!	#NULL!	#NULL!	#NULL!	#NULL!	#NULL!	#NULL!	#NULL!	#NULL!	#NULL!	#NULL!	#NULL!	#NULL!	#NULL!	#NULL!	#NULL!	#NULL!	#NULL!	#NULL!	#NULL!	#NULL!	#NULL!	#NULL!	2	2	0
168	SS	1	20	2	2	#NULL!	#NULL!	#NULL!	#NULL!	#NULL!	#NULL!	#NULL!	#NULL!	#NULL!	#NULL!	#NULL!	#NULL!	#NULL!	#NULL!	#NULL!	#NULL!	#NULL!	#NULL!	#NULL!	#NULL!	#NULL!	#NULL!	#NULL!	#NULL!	#NULL!	#NULL!	#NULL!	#NULL!	#NULL!	#NULL!	#NULL!	#NULL!	#NULL!	#NULL!	#NULL!	#NULL!	#NULL!	#NULL!	#NULL!	#NULL!	#NULL!	2	1	0
170	SS	1	19	1	2	#NULL!	#NULL!	#NULL!	#NULL!	#NULL!	#NULL!	#NULL!	#NULL!	#NULL!	#NULL!	#NULL!	#NULL!	#NULL!	#NULL!	#NULL!	#NULL!	#NULL!	#NULL!	#NULL!	#NULL!	#NULL!	#NULL!	#NULL!	#NULL!	#NULL!	#NULL!	#NULL!	#NULL!	#NULL!	#NULL!	#NULL!	#NULL!	#NULL!	#NULL!	#NULL!	#NULL!	#NULL!	#NULL!	#NULL!	#NULL!	#NULL!	2	1	0
177	SS	2	22	2	2	#NULL!	#NULL!	#NULL!	#NULL!	#NULL!	#NULL!	#NULL!	#NULL!	#NULL!	#NULL!	#NULL!	#NULL!	#NULL!	#NULL!	#NULL!	#NULL!	#NULL!	#NULL!	#NULL!	#NULL!	#NULL!	#NULL!	#NULL!	#NULL!	#NULL!	#NULL!	#NULL!	#NULL!	#NULL!	#NULL!	#NULL!	#NULL!	#NULL!	#NULL!	#NULL!	#NULL!	#NULL!	#NULL!	#NULL!	#NULL!	#NULL!	2	2	0
180	SS	2	21	1	2	#NULL!	#NULL!	#NULL!	#NULL!	#NULL!	#NULL!	#NULL!	#NULL!	#NULL!	#NULL!	#NULL!	#NULL!	#NULL!	#NULL!	#NULL!	#NULL!	#NULL!	#NULL!	#NULL!	#NULL!	#NULL!	#NULL!	#NULL!	#NULL!	#NULL!	#NULL!	#NULL!	#NULL!	#NULL!	#NULL!	#NULL!	#NULL!	#NULL!	#NULL!	#NULL!	#NULL!	#NULL!	#NULL!	#NULL!	#NULL!	#NULL!	2	2	0
182	SS	1	20	2	2	#NULL!	#NULL!	#NULL!	#NULL!	#NULL!	#NULL!	#NULL!	#NULL!	#NULL!	#NULL!	#NULL!	#NULL!	#NULL!	#NULL!	#NULL!	#NULL!	#NULL!	#NULL!	#NULL!	#NULL!	#NULL!	#NULL!	#NULL!	#NULL!	#NULL!	#NULL!	#NULL!	#NULL!	#NULL!	#NULL!	#NULL!	#NULL!	#NULL!	#NULL!	#NULL!	#NULL!	#NULL!	#NULL!	#NULL!	#NULL!	#NULL!	2	1	0
192	SS	2	20	2	2	#NULL!	#NULL!	#NULL!	#NULL!	#NULL!	#NULL!	#NULL!	#NULL!	#NULL!	#NULL!	#NULL!	#NULL!	#NULL!	#NULL!	#NULL!	#NULL!	#NULL!	#NULL!	#NULL!	#NULL!	#NULL!	#NULL!	#NULL!	#NULL!	#NULL!	#NULL!	#NULL!	#NULL!	#NULL!	#NULL!	#NULL!	#NULL!	#NULL!	#NULL!	#NULL!	#NULL!	#NULL!	#NULL!	#NULL!	#NULL!	#NULL!	2	1	0
197	SS	1	21	2	2	#NULL!	#NULL!	#NULL!	#NULL!	#NULL!	#NULL!	#NULL!	#NULL!	#NULL!	#NULL!	#NULL!	#NULL!	#NULL!	#NULL!	#NULL!	#NULL!	#NULL!	#NULL!	#NULL!	#NULL!	#NULL!	#NULL!	#NULL!	#NULL!	#NULL!	#NULL!	#NULL!	#NULL!	#NULL!	#NULL!	#NULL!	#NULL!	#NULL!	#NULL!	#NULL!	#NULL!	#NULL!	#NULL!	#NULL!	#NULL!	#NULL!	2	2	0
199	SS	1	20	2	2	#NULL!	#NULL!	#NULL!	#NULL!	#NULL!	#NULL!	#NULL!	#NULL!	#NULL!	#NULL!	#NULL!	#NULL!	#NULL!	#NULL!	#NULL!	#NULL!	#NULL!	#NULL!	#NULL!	#NULL!	#NULL!	#NULL!	#NULL!	#NULL!	#NULL!	#NULL!	#NULL!	#NULL!	#NULL!	#NULL!	#NULL!	#NULL!	#NULL!	#NULL!	#NULL!	#NULL!	#NULL!	#NULL!	#NULL!	#NULL!	#NULL!	2	1	0
207	SS	1	21	2	2	#NULL!	#NULL!	#NULL!	#NULL!	#NULL!	#NULL!	#NULL!	#NULL!	#NULL!	#NULL!	#NULL!	#NULL!	#NULL!	#NULL!	#NULL!	#NULL!	#NULL!	#NULL!	#NULL!	#NULL!	#NULL!	#NULL!	#NULL!	#NULL!	#NULL!	#NULL!	#NULL!	#NULL!	#NULL!	#NULL!	#NULL!	#NULL!	#NULL!	#NULL!	#NULL!	#NULL!	#NULL!	#NULL!	#NULL!	#NULL!	#NULL!	2	2	0
208	SS	1	20	1	2	#NULL!	#NULL!	#NULL!	#NULL!	#NULL!	#NULL!	#NULL!	#NULL!	#NULL!	#NULL!	#NULL!	#NULL!	#NULL!	#NULL!	#NULL!	#NULL!	#NULL!	#NULL!	#NULL!	#NULL!	#NULL!	#NULL!	#NULL!	#NULL!	#NULL!	#NULL!	#NULL!	#NULL!	#NULL!	#NULL!	#NULL!	#NULL!	#NULL!	#NULL!	#NULL!	#NULL!	#NULL!	#NULL!	#NULL!	#NULL!	#NULL!	2	1	0
212	AG	2	21	2	2	#NULL!	#NULL!	#NULL!	#NULL!	#NULL!	#NULL!	#NULL!	#NULL!	#NULL!	#NULL!	#NULL!	#NULL!	#NULL!	#NULL!	#NULL!	#NULL!	#NULL!	#NULL!	#NULL!	#NULL!	#NULL!	#NULL!	#NULL!	#NULL!	#NULL!	#NULL!	#NULL!	#NULL!	#NULL!	#NULL!	#NULL!	#NULL!	#NULL!	#NULL!	#NULL!	#NULL!	#NULL!	#NULL!	#NULL!	#NULL!	#NULL!	2	2	0
225	AG	1	20	2	2	#NULL!	#NULL!	#NULL!	#NULL!	#NULL!	#NULL!	#NULL!	#NULL!	#NULL!	#NULL!	#NULL!	#NULL!	#NULL!	#NULL!	#NULL!	#NULL!	#NULL!	#NULL!	#NULL!	#NULL!	#NULL!	#NULL!	#NULL!	#NULL!	#NULL!	#NULL!	#NULL!	#NULL!	#NULL!	#NULL!	#NULL!	#NULL!	#NULL!	#NULL!	#NULL!	#NULL!	#NULL!	#NULL!	#NULL!	#NULL!	#NULL!	2	1	0
249	AG	1	20	1	2	#NULL!	#NULL!	#NULL!	#NULL!	#NULL!	#NULL!	#NULL!	#NULL!	#NULL!	#NULL!	#NULL!	#NULL!	#NULL!	#NULL!	#NULL!	#NULL!	#NULL!	#NULL!	#NULL!	#NULL!	#NULL!	#NULL!	#NULL!	#NULL!	#NULL!	#NULL!	#NULL!	#NULL!	#NULL!	#NULL!	#NULL!	#NULL!	#NULL!	#NULL!	#NULL!	#NULL!	#NULL!	#NULL!	#NULL!	#NULL!	#NULL!	2	1	0
252	AG	2	20	2	2	#NULL!	#NULL!	#NULL!	#NULL!	#NULL!	#NULL!	#NULL!	#NULL!	#NULL!	#NULL!	#NULL!	#NULL!	#NULL!	#NULL!	#NULL!	#NULL!	#NULL!	#NULL!	#NULL!	#NULL!	#NULL!	#NULL!	#NULL!	#NULL!	#NULL!	#NULL!	#NULL!	#NULL!	#NULL!	#NULL!	#NULL!	#NULL!	#NULL!	#NULL!	#NULL!	#NULL!	#NULL!	#NULL!	#NULL!	#NULL!	#NULL!	2	1	0
256	AG	2	20	2	2	#NULL!	#NULL!	#NULL!	#NULL!	#NULL!	#NULL!	#NULL!	#NULL!	#NULL!	#NULL!	#NULL!	#NULL!	#NULL!	#NULL!	#NULL!	#NULL!	#NULL!	#NULL!	#NULL!	#NULL!	#NULL!	#NULL!	#NULL!	#NULL!	#NULL!	#NULL!	#NULL!	#NULL!	#NULL!	#NULL!	#NULL!	#NULL!	#NULL!	#NULL!	#NULL!	#NULL!	#NULL!	#NULL!	#NULL!	#NULL!	#NULL!	2	1	0
264	AG	2	20	2	2	#NULL!	#NULL!	#NULL!	#NULL!	#NULL!	#NULL!	#NULL!	#NULL!	#NULL!	#NULL!	#NULL!	#NULL!	#NULL!	#NULL!	#NULL!	#NULL!	#NULL!	#NULL!	#NULL!	#NULL!	#NULL!	#NULL!	#NULL!	#NULL!	#NULL!	#NULL!	#NULL!	#NULL!	#NULL!	#NULL!	#NULL!	#NULL!	#NULL!	#NULL!	#NULL!	#NULL!	#NULL!	#NULL!	#NULL!	#NULL!	#NULL!	2	1	0
265	AG	2	20	2	2	#NULL!	#NULL!	#NULL!	#NULL!	#NULL!	#NULL!	#NULL!	#NULL!	#NULL!	#NULL!	#NULL!	#NULL!	#NULL!	#NULL!	#NULL!	#NULL!	#NULL!	#NULL!	#NULL!	#NULL!	#NULL!	#NULL!	#NULL!	#NULL!	#NULL!	#NULL!	#NULL!	#NULL!	#NULL!	#NULL!	#NULL!	#NULL!	#NULL!	#NULL!	#NULL!	#NULL!	#NULL!	#NULL!	#NULL!	#NULL!	#NULL!	2	1	0
272	AG	2	22	2	2	#NULL!	#NULL!	#NULL!	#NULL!	#NULL!	#NULL!	#NULL!	#NULL!	#NULL!	#NULL!	#NULL!	#NULL!	#NULL!	#NULL!	#NULL!	#NULL!	#NULL!	#NULL!	#NULL!	#NULL!	#NULL!	#NULL!	#NULL!	#NULL!	#NULL!	#NULL!	#NULL!	#NULL!	#NULL!	#NULL!	#NULL!	#NULL!	#NULL!	#NULL!	#NULL!	#NULL!	#NULL!	#NULL!	#NULL!	#NULL!	#NULL!	2	2	0
294	AG	2	20	1	2	#NULL!	#NULL!	#NULL!	#NULL!	#NULL!	#NULL!	#NULL!	#NULL!	#NULL!	#NULL!	#NULL!	#NULL!	#NULL!	#NULL!	#NULL!	#NULL!	#NULL!	#NULL!	#NULL!	#NULL!	#NULL!	#NULL!	#NULL!	#NULL!	#NULL!	#NULL!	#NULL!	#NULL!	#NULL!	#NULL!	#NULL!	#NULL!	#NULL!	#NULL!	#NULL!	#NULL!	#NULL!	#NULL!	#NULL!	#NULL!	#NULL!	2	1	0
295	AG	2	19	1	2	#NULL!	#NULL!	#NULL!	#NULL!	#NULL!	#NULL!	#NULL!	#NULL!	#NULL!	#NULL!	#NULL!	#NULL!	#NULL!	#NULL!	#NULL!	#NULL!	#NULL!	#NULL!	#NULL!	#NULL!	#NULL!	#NULL!	#NULL!	#NULL!	#NULL!	#NULL!	#NULL!	#NULL!	#NULL!	#NULL!	#NULL!	#NULL!	#NULL!	#NULL!	#NULL!	#NULL!	#NULL!	#NULL!	#NULL!	#NULL!	#NULL!	2	1	0
297	AG	2	20	2	2	#NULL!	#NULL!	#NULL!	#NULL!	#NULL!	#NULL!	#NULL!	#NULL!	#NULL!	#NULL!	#NULL!	#NULL!	#NULL!	#NULL!	#NULL!	#NULL!	#NULL!	#NULL!	#NULL!	#NULL!	#NULL!	#NULL!	#NULL!	#NULL!	#NULL!	#NULL!	#NULL!	#NULL!	#NULL!	#NULL!	#NULL!	#NULL!	#NULL!	#NULL!	#NULL!	#NULL!	#NULL!	#NULL!	#NULL!	#NULL!	#NULL!	2	1	0
303	AG	1	20	1	2	#NULL!	#NULL!	#NULL!	#NULL!	#NULL!	#NULL!	#NULL!	#NULL!	#NULL!	#NULL!	#NULL!	#NULL!	#NULL!	#NULL!	#NULL!	#NULL!	#NULL!	#NULL!	#NULL!	#NULL!	#NULL!	#NULL!	#NULL!	#NULL!	#NULL!	#NULL!	#NULL!	#NULL!	#NULL!	#NULL!	#NULL!	#NULL!	#NULL!	#NULL!	#NULL!	#NULL!	#NULL!	#NULL!	#NULL!	#NULL!	#NULL!	2	1	0
103	NS	1	21	2	1	2	1	2	1	2	1	1	1	1	2	1	1	2	1	1	1	2	#NULL!	#NULL!	2	#NULL!	#NULL!	#NULL!	2	1	1	1	1	1	1	1	1	1	2	1	3	1	1	1	1	1	1	2	1
30	BE	1	20	2	1	2	1	2	2	2	1	2	2	1	2	2	2	2	2	#NULL!	1	1	3	#NULL!	2	#NULL!	#NULL!	#NULL!	2	1	1	2	2	1	2	2	2	3	2	3	1	2	1	2	2	1	1	1	1
231	AG	1	21	2	1	1	2	2	2	2	1	2	2	1	2	2	2	2	2	#NULL!	1	2	#NULL!	#NULL!	2	#NULL!	#NULL!	#NULL!	2	1	2	2	1	2	1	1	1	1	1	1	1	1	1	3	2	2	2	2	1
159	AG	1	20	2	1	2	2	1	2	2	1	2	1	2	2	2	2	2	2	#NULL!	1	1	1	1	2	#NULL!	#NULL!	#NULL!	1	1	2	1	2	2	1	1	1	1	1	1	1	1	1	1	1	2	2	1	0
111	NS	1	18	2	1	2	1	2	2	2	1	1	1	1	1	2	1	1	2	#NULL!	2	#NULL!	#NULL!	#NULL!	2	#NULL!	#NULL!	#NULL!	2	1	1	2	2	2	2	2	2	2	2	2	2	2	1	4	1	2	2	1	1
244	AG	1	21	2	1	2	1	2	2	2	2	#NULL!	#NULL!	#NULL!	#NULL!	#NULL!	#NULL!	#NULL!	2	#NULL!	1	1	1	1	2	#NULL!	#NULL!	#NULL!	2	1	1	2	2	2	1	1	1	2	1	1	1	1	1	1	2	2	2	2	0
254	AG	2	19	1	1	2	1	1	2	1	1	1	1	2	2	2	1	2	1	3	1	1	2	#NULL!	2	#NULL!	#NULL!	#NULL!	2	1	1	1	1	2	1	1	1	1	1	1	3	1	1	2	2	2	2	1	0
138	AG	1	20	2	1	1	2	2	2	2	1	2	1	2	2	2	2	2	1	2	2	#NULL!	#NULL!	#NULL!	3	#NULL!	#NULL!	#NULL!	2	1	2	2	2	2	1	1	2	1	2	1	2	2	1	1	1	2	2	1	0
232	AG	1	20	2	1	1	1	2	2	2	2	#NULL!	#NULL!	#NULL!	#NULL!	#NULL!	#NULL!	#NULL!	1	2	1	1	2	#NULL!	3	#NULL!	#NULL!	#NULL!	2	1	2	1	2	2	1	1	2	1	2	1	2	3	1	1	1	2	2	1	0
15	BE	1	20	1	1	2	1	2	2	2	1	1	2	2	2	2	2	2	1	1	2	#NULL!	#NULL!	#NULL!	2	#NULL!	#NULL!	#NULL!	2	2	#NULL!	#NULL!	#NULL!	#NULL!	2	2	2	1	1	1	2	2	1	1	1	2	2	1	0
300	AG	2	20	1	1	1	1	1	2	2	1	2	1	2	2	2	2	2	1	1	2	#NULL!	#NULL!	#NULL!	2	#NULL!	#NULL!	#NULL!	2	2	#NULL!	#NULL!	#NULL!	#NULL!	1	1	1	2	2	2	2	2	1	2	2	2	2	1	0
322	AG	1	21	2	1	2	2	2	2	1	1	1	2	2	2	2	2	2	1	3	1	1	1	1	2	#NULL!	#NULL!	#NULL!	2	2	#NULL!	#NULL!	#NULL!	#NULL!	1	1	2	1	1	2	2	1	1	1	1	2	2	2	0
3	BE	2	21	1	1	2	2	2	2	1	1	2	2	2	2	2	1	2	1	2	1	3	#NULL!	#NULL!	3	#NULL!	#NULL!	#NULL!	1	2	#NULL!	#NULL!	#NULL!	#NULL!	1	2	1	2	1	3	1	3	1	2	1	2	2	2	0
38	BE	1	25	2	1	2	2	2	2	1	1	1	2	2	2	2	2	2	1	2	1	3	#NULL!	#NULL!	2	#NULL!	#NULL!	#NULL!	2	3	#NULL!	#NULL!	#NULL!	#NULL!	1	1	1	1	3	3	3	1	1	2	2	2	2	2	0
7	BE	1	21	1	1	2	2	2	2	1	1	2	2	2	2	2	1	2	2	#NULL!	1	3	#NULL!	#NULL!	2	#NULL!	#NULL!	#NULL!	1	3	#NULL!	#NULL!	#NULL!	#NULL!	1	2	1	2	1	1	2	2	1	3	1	2	2	2	0
11	BE	1	20	2	1	2	2	2	1	2	1	2	2	1	2	2	2	2	1	2	1	3	#NULL!	#NULL!	2	#NULL!	#NULL!	#NULL!	1	3	#NULL!	#NULL!	#NULL!	#NULL!	1	2	2	2	1	2	1	2	1	2	2	2	2	1	1
242	AG	1	21	1	1	2	2	1	2	2	2	#NULL!	#NULL!	#NULL!	#NULL!	#NULL!	#NULL!	#NULL!	2	#NULL!	2	#NULL!	#NULL!	#NULL!	3	#NULL!	#NULL!	#NULL!	2	3	#NULL!	#NULL!	#NULL!	#NULL!	1	1	1	1	3	3	2	1	1	1	1	2	2	2	0
318	AG	1	20	2	1	2	2	1	2	2	2	#NULL!	#NULL!	#NULL!	#NULL!	#NULL!	#NULL!	#NULL!	1	2	1	1	2	#NULL!	1	2	#NULL!	#NULL!	1	1	2	2	1	2	1	1	1	1	1	1	1	1	1	1	1	2	2	1	0
92	NS	2	19	2	1	2	1	2	2	2	1	2	2	2	2	1	2	2	2	#NULL!	1	2	#NULL!	#NULL!	1	2	#NULL!	#NULL!	1	1	1	2	2	2	1	1	1	1	2	1	1	2	1	1	1	2	2	1	0
198	SS	1	20	2	1	2	2	1	2	2	1	2	2	2	1	2	2	2	1	2	1	1	1	1	1	7	#NULL!	#NULL!	1	3	#NULL!	#NULL!	#NULL!	#NULL!	1	1	1	1	1	1	2	1	1	2	1	2	2	1	0
17	BE	1	20	2	1	1	2	1	2	2	2	#NULL!	#NULL!	#NULL!	#NULL!	#NULL!	#NULL!	#NULL!	2	#NULL!	2	#NULL!	#NULL!	#NULL!	2	#NULL!	#NULL!	#NULL!	2	1	2	1	2	#NULL!	2	1	3	3	1	1	2	3	2	1	2	2	2	1	0
19	BE	1	21	2	1	1	2	1	2	1	2	#NULL!	#NULL!	#NULL!	#NULL!	#NULL!	#NULL!	#NULL!	2	#NULL!	2	#NULL!	#NULL!	#NULL!	2	#NULL!	#NULL!	#NULL!	2	1	2	1	2	#NULL!	2	1	3	3	1	1	2	3	2	1	2	2	2	2	0
86	BE	1	22	2	1	1	2	2	2	2	1	2	1	2	2	2	2	2	2	#NULL!	2	#NULL!	#NULL!	#NULL!	2	#NULL!	#NULL!	#NULL!	2	1	2	1	2	2	1	3	1	1	3	1	2	1	2	2	2	2	2	2	0
14	BE	1	19	1	1	2	2	1	2	2	1	2	1	2	2	1	2	2	1	2	1	3	#NULL!	#NULL!	2	#NULL!	#NULL!	#NULL!	2	1	2	1	2	2	1	1	2	2	3	2	1	3	2	1	1	2	2	1	0
292	AG	2	19	1	1	2	2	2	2	2	2	#NULL!	#NULL!	#NULL!	#NULL!	#NULL!	#NULL!	#NULL!	2	#NULL!	1	1	1	#NULL!	2	#NULL!	#NULL!	#NULL!	2	1	2	2	1	2	2	1	1	1	1	1	1	3	2	3	2	2	2	1	0
33	BE	1	19	2	1	2	2	1	2	2	1	2	2	2	1	2	2	2	1	1	2	#NULL!	#NULL!	#NULL!	2	#NULL!	#NULL!	#NULL!	2	1	1	2	2	2	3	1	2	1	1	2	2	2	2	4	1	2	2	1	0
213	AG	1	21	2	1	1	2	2	2	2	1	1	2	2	2	2	2	2	1	2	1	1	2	#NULL!	2	#NULL!	#NULL!	#NULL!	1	1	2	1	2	2	2	2	1	2	1	2	2	1	2	2	1	2	2	2	0
284	AG	2	22	2	1	1	1	1	1	1	1	2	1	2	2	2	1	2	1	2	1	1	2	#NULL!	2	#NULL!	#NULL!	#NULL!	2	1	1	2	2	2	2	2	3	1	1	2	1	2	2	1	2	2	2	2	0
150	AG	1	20	1	1	2	2	2	2	2	1	1	1	1	1	1	1	2	1	2	1	1	1	#NULL!	2	#NULL!	#NULL!	#NULL!	2	1	1	1	1	2	2	3	1	1	1	1	1	3	2	3	2	2	2	1	1
285	AG	2	20	2	1	2	2	2	1	2	1	1	1	1	2	1	1	2	1	2	1	1	2	#NULL!	2	#NULL!	#NULL!	#NULL!	2	1	1	1	2	2	2	3	1	1	2	1	2	3	2	1	2	2	2	1	1
307	AG	1	21	2	1	2	2	1	2	1	1	1	1	1	1	1	1	2	1	2	1	1	1	3	2	#NULL!	#NULL!	#NULL!	2	1	1	2	1	2	3	1	1	1	1	1	1	3	2	1	2	2	2	2	1
236	AG	1	20	2	1	2	1	2	2	2	2	#NULL!	#NULL!	#NULL!	#NULL!	#NULL!	#NULL!	#NULL!	1	2	2	#NULL!	#NULL!	#NULL!	3	#NULL!	#NULL!	#NULL!	2	1	2	2	1	2	2	3	1	1	1	3	3	1	2	1	2	2	2	1	0
187	NS	1	22	1	1	2	2	1	2	2	1	2	1	2	2	2	2	2	1	2	1	2	#NULL!	#NULL!	3	#NULL!	#NULL!	#NULL!	2	1	2	1	2	2	1	1	3	1	3	3	3	3	2	2	2	2	2	2	0
135	NS	1	20	2	1	2	1	2	2	2	1	1	2	2	2	2	2	2	1	1	2	#NULL!	#NULL!	#NULL!	3	#NULL!	#NULL!	#NULL!	2	1	1	2	2	2	2	3	1	2	1	2	1	2	2	4	2	2	2	1	0
18	BE	1	24	2	1	2	1	2	1	1	1	1	1	1	1	2	1	1	2	#NULL!	1	1	1	#NULL!	3	#NULL!	#NULL!	#NULL!	2	1	1	1	1	2	1	3	1	1	1	1	1	3	2	4	2	2	2	2	1
283	AG	2	20	1	1	2	2	2	2	1	1	2	2	2	2	2	1	2	2	#NULL!	2	#NULL!	#NULL!	#NULL!	2	#NULL!	#NULL!	#NULL!	2	2	#NULL!	#NULL!	#NULL!	#NULL!	1	2	2	1	1	1	2	1	2	2	1	2	2	1	0
49	BE	1	20	2	1	2	1	2	2	2	2	#NULL!	#NULL!	#NULL!	#NULL!	#NULL!	#NULL!	#NULL!	2	#NULL!	2	#NULL!	#NULL!	#NULL!	2	#NULL!	#NULL!	#NULL!	1	2	#NULL!	#NULL!	#NULL!	#NULL!	2	1	3	1	1	3	3	3	2	1	1	2	2	1	0
289	AG	2	21	2	1	2	2	2	2	1	1	2	2	2	2	2	1	2	2	#NULL!	1	3	#NULL!	#NULL!	3	#NULL!	#NULL!	#NULL!	1	2	#NULL!	#NULL!	#NULL!	#NULL!	2	1	2	1	3	1	2	1	2	4	1	2	2	2	0
215	AG	1	22	2	1	2	2	2	2	1	1	2	1	2	2	2	2	2	1	1	2	#NULL!	#NULL!	#NULL!	2	#NULL!	#NULL!	#NULL!	2	3	#NULL!	#NULL!	#NULL!	#NULL!	1	2	1	1	3	3	1	1	2	1	2	2	2	2	0
110	NS	1	20	2	1	1	2	2	2	2	1	2	2	1	2	2	2	2	1	1	2	#NULL!	#NULL!	#NULL!	2	#NULL!	#NULL!	#NULL!	1	3	#NULL!	#NULL!	#NULL!	#NULL!	2	1	2	2	1	1	1	1	2	1	2	2	2	1	1
310	AG	1	21	2	1	2	1	2	2	2	1	2	2	2	1	2	2	2	2	#NULL!	1	3	#NULL!	#NULL!	3	#NULL!	#NULL!	#NULL!	1	3	#NULL!	#NULL!	#NULL!	#NULL!	3	3	3	3	3	3	3	3	2	3	2	2	2	2	0
146	AG	1	20	2	1	2	2	2	1	2	1	2	2	1	2	2	2	2	1	2	1	1	1	#NULL!	3	#NULL!	#NULL!	#NULL!	1	3	#NULL!	#NULL!	#NULL!	#NULL!	1	1	1	3	1	3	1	3	2	2	1	2	2	1	1
258	AG	2	21	2	1	1	2	2	2	2	1	2	2	2	2	2	1	2	1	2	2	#NULL!	#NULL!	#NULL!	1	2	#NULL!	#NULL!	1	1	2	2	1	2	1	3	1	1	3	1	1	2	2	1	2	2	2	2	0
228	AG	1	20	2	1	2	1	2	2	2	2	#NULL!	#NULL!	#NULL!	#NULL!	#NULL!	#NULL!	#NULL!	2	#NULL!	1	3	#NULL!	#NULL!	1	4	#NULL!	#NULL!	2	1	1	2	2	2	2	1	1	1	2	2	2	1	2	3	2	2	2	1	0
171	SS	1	20	2	1	2	2	1	2	2	1	2	2	1	2	2	2	2	1	1	1	3	#NULL!	#NULL!	1	4	#NULL!	#NULL!	1	1	2	1	2	2	1	2	3	1	2	3	1	1	2	2	1	2	2	1	1
47	BE	1	24	2	1	1	1	1	2	2	1	1	1	1	2	2	1	2	1	2	1	2	#NULL!	#NULL!	1	5	#NULL!	#NULL!	2	1	2	1	2	2	1	1	1	1	2	2	1	1	2	2	2	2	2	2	1
214	AG	1	21	2	1	2	2	1	2	2	2	#NULL!	#NULL!	#NULL!	#NULL!	#NULL!	#NULL!	#NULL!	1	2	1	2	#NULL!	#NULL!	1	5	#NULL!	#NULL!	1	1	2	1	2	2	1	1	2	2	2	1	1	1	2	1	1	2	2	2	0
31	BE	1	20	2	1	2	1	2	2	2	1	1	2	2	2	2	2	2	1	3	1	1	2	#NULL!	1	6	#NULL!	#NULL!	2	2	#NULL!	#NULL!	#NULL!	#NULL!	1	2	1	3	2	2	1	2	2	4	2	2	2	1	0
132	NS	1	20	2	1	2	1	2	2	2	2	#NULL!	#NULL!	#NULL!	#NULL!	#NULL!	#NULL!	#NULL!	2	#NULL!	1	3	#NULL!	#NULL!	2	#NULL!	#NULL!	#NULL!	2	1	2	2	1	1	3	1	1	1	2	1	3	1	3	#NULL!	2	1	1	1	0
68	NS	1	20	2	1	2	1	2	2	2	1	1	1	2	1	2	2	2	1	1	1	1	2	#NULL!	2	#NULL!	#NULL!	#NULL!	2	1	1	2	2	1	1	1	1	1	2	1	1	3	3	#NULL!	2	1	1	1	0
77	NS	2	19	1	1	2	2	2	1	2	1	1	1	2	2	2	2	2	1	3	1	1	3	#NULL!	2	#NULL!	#NULL!	#NULL!	2	1	1	1	1	1	1	2	1	1	1	1	1	1	3	#NULL!	2	1	1	1	0
229	AG	2	21	2	1	1	2	1	2	2	1	2	1	2	1	2	1	2	1	1	1	1	1	#NULL!	2	#NULL!	#NULL!	#NULL!	2	1	1	2	1	1	1	1	1	1	1	2	1	1	3	#NULL!	2	1	1	2	0
82	NS	2	20	1	1	2	2	2	2	1	1	2	2	1	2	2	2	2	1	2	1	1	1	1	2	#NULL!	#NULL!	#NULL!	2	1	1	2	2	1	2	2	1	1	1	1	1	1	3	#NULL!	1	1	1	1	1
94	NS	2	19	2	1	1	1	2	2	2	1	2	1	1	2	2	2	2	1	2	1	1	1	1	2	#NULL!	#NULL!	#NULL!	2	1	1	2	1	1	3	1	1	3	1	1	2	1	3	#NULL!	2	1	1	1	1
261	AG	2	19	1	1	2	2	2	1	2	2	#NULL!	#NULL!	#NULL!	#NULL!	#NULL!	#NULL!	#NULL!	2	#NULL!	2	#NULL!	#NULL!	#NULL!	2	#NULL!	#NULL!	#NULL!	2	1	2	2	1	2	1	3	1	1	3	3	1	3	3	#NULL!	2	2	2	1	0
101	NS	1	21	2	1	1	2	2	2	2	1	2	1	2	2	2	2	2	1	2	2	#NULL!	#NULL!	#NULL!	2	#NULL!	#NULL!	#NULL!	2	1	2	2	1	2	1	3	1	1	1	3	1	2	3	#NULL!	1	2	2	2	0
253	AG	2	20	2	1	2	2	1	2	2	1	2	1	2	2	1	2	2	2	#NULL!	2	#NULL!	#NULL!	#NULL!	2	#NULL!	#NULL!	#NULL!	2	1	2	2	1	2	2	3	1	1	2	3	1	1	3	#NULL!	2	2	2	1	0
293	AG	2	21	1	1	2	2	2	2	2	2	#NULL!	#NULL!	#NULL!	#NULL!	#NULL!	#NULL!	#NULL!	2	#NULL!	1	3	#NULL!	#NULL!	2	#NULL!	#NULL!	#NULL!	2	1	2	2	1	2	2	1	1	1	2	2	2	1	3	#NULL!	2	2	2	2	0
306	AG	1	19	2	1	1	2	1	2	2	2	#NULL!	#NULL!	#NULL!	#NULL!	#NULL!	#NULL!	#NULL!	1	2	1	2	#NULL!	#NULL!	2	#NULL!	#NULL!	#NULL!	2	1	2	2	1	2	2	3	1	1	2	1	3	1	3	#NULL!	2	2	2	1	0
51	BE	2	21	2	1	2	2	2	1	2	1	1	2	2	2	2	2	2	2	#NULL!	1	3	#NULL!	#NULL!	2	#NULL!	#NULL!	#NULL!	2	1	2	2	1	2	1	1	1	1	2	3	1	3	3	#NULL!	1	2	2	2	0
100	NS	1	22	2	1	2	2	2	2	1	1	2	1	2	2	2	2	2	2	#NULL!	1	2	#NULL!	#NULL!	2	#NULL!	#NULL!	#NULL!	2	1	2	1	2	2	1	1	1	3	1	3	3	1	3	#NULL!	1	2	2	2	0
240	AG	1	21	2	1	1	2	2	2	2	1	2	1	2	1	2	2	2	1	2	1	2	#NULL!	#NULL!	2	#NULL!	#NULL!	#NULL!	2	1	2	2	1	2	3	3	1	1	3	3	3	3	3	#NULL!	2	2	2	2	0
273	AG	2	20	1	1	2	2	2	1	2	1	1	1	2	2	2	1	2	2	#NULL!	1	3	#NULL!	#NULL!	2	#NULL!	#NULL!	#NULL!	2	1	2	2	2	2	1	1	1	1	3	3	2	1	3	#NULL!	2	2	2	1	0
50	BE	2	21	2	1	2	2	1	2	2	1	2	1	1	2	2	1	2	2	#NULL!	1	3	#NULL!	#NULL!	2	#NULL!	#NULL!	#NULL!	2	1	2	1	2	2	2	1	1	1	3	3	1	3	3	#NULL!	2	2	2	2	1
178	SS	2	20	2	1	2	1	2	2	2	1	1	1	1	2	2	2	2	2	#NULL!	1	3	#NULL!	#NULL!	2	#NULL!	#NULL!	#NULL!	2	1	2	1	2	2	2	1	1	1	1	3	1	3	3	#NULL!	2	2	2	1	1
276	AG	2	20	2	1	2	2	2	2	1	1	2	2	1	2	2	2	2	2	#NULL!	1	3	#NULL!	#NULL!	2	#NULL!	#NULL!	#NULL!	2	1	2	2	1	2	2	1	1	1	1	1	2	1	3	#NULL!	2	2	2	1	1
167	SS	2	20	2	1	2	1	2	2	2	2	#NULL!	#NULL!	#NULL!	#NULL!	#NULL!	#NULL!	#NULL!	1	1	1	1	1	3	2	#NULL!	#NULL!	#NULL!	2	1	2	2	1	2	2	2	1	2	3	2	1	2	3	#NULL!	2	2	2	1	0
291	AG	2	21	1	1	2	2	2	2	2	2	#NULL!	#NULL!	#NULL!	#NULL!	#NULL!	#NULL!	#NULL!	2	#NULL!	1	1	1	#NULL!	2	#NULL!	#NULL!	#NULL!	2	1	2	2	1	2	2	1	1	1	1	1	1	3	3	#NULL!	2	2	2	2	0
40	BE	1	22	2	1	1	2	2	2	2	1	2	1	2	2	2	2	2	1	2	1	1	1	1	2	#NULL!	#NULL!	#NULL!	2	1	2	2	1	2	3	3	1	1	3	3	3	3	3	#NULL!	2	2	2	2	0
84	NS	1	22	2	1	2	1	1	2	2	1	2	1	2	1	2	2	2	1	2	1	1	1	1	2	#NULL!	#NULL!	#NULL!	2	1	2	2	1	2	1	1	1	1	1	3	1	1	3	#NULL!	2	2	2	2	0
85	NS	1	20	2	1	1	1	2	2	2	1	1	2	2	1	2	1	2	1	2	1	1	1	#NULL!	2	#NULL!	#NULL!	#NULL!	2	1	2	2	1	2	1	1	1	1	1	3	1	1	3	#NULL!	2	2	2	1	0
165	SS	2	19	2	1	2	2	1	2	2	1	2	1	2	2	2	2	2	1	2	1	1	3	#NULL!	2	#NULL!	#NULL!	#NULL!	2	1	2	1	2	2	2	2	3	1	1	2	2	3	3	#NULL!	2	2	2	1	0
210	SS	1	20	2	1	2	1	2	2	2	1	2	1	2	2	2	2	2	1	2	1	1	1	1	2	#NULL!	#NULL!	#NULL!	2	1	2	1	2	2	1	2	1	2	1	2	1	2	3	#NULL!	2	2	2	1	0
282	AG	2	21	2	1	2	1	2	2	2	1	2	2	2	2	2	1	2	1	2	1	1	3	#NULL!	2	#NULL!	#NULL!	#NULL!	2	1	2	1	2	2	3	3	3	1	3	1	2	3	3	#NULL!	2	2	2	2	0
319	AG	2	22	1	1	2	1	2	2	2	1	2	1	1	2	2	1	2	2	#NULL!	1	3	#NULL!	#NULL!	2	#NULL!	#NULL!	#NULL!	2	1	2	2	1	2	1	1	1	1	2	1	1	1	3	#NULL!	2	2	2	2	1
36	BE	1	23	2	1	2	2	1	1	2	1	2	1	2	2	2	1	2	2	#NULL!	2	#NULL!	#NULL!	#NULL!	2	#NULL!	#NULL!	#NULL!	1	1	2	2	1	2	2	1	1	1	2	3	3	1	3	#NULL!	2	2	2	2	0
81	BE	2	22	2	1	2	1	1	2	2	2	#NULL!	#NULL!	#NULL!	#NULL!	#NULL!	#NULL!	#NULL!	2	#NULL!	1	3	#NULL!	#NULL!	2	#NULL!	#NULL!	#NULL!	2	1	1	2	2	2	1	1	1	1	2	1	3	3	3	#NULL!	1	2	2	2	0
122	NS	1	21	1	1	2	2	1	2	2	2	#NULL!	#NULL!	#NULL!	#NULL!	#NULL!	#NULL!	#NULL!	2	#NULL!	1	3	#NULL!	#NULL!	2	#NULL!	#NULL!	#NULL!	2	1	1	1	1	2	2	2	1	1	2	2	2	3	3	#NULL!	2	2	2	2	0
233	AG	1	25	2	1	2	1	2	2	2	2	#NULL!	#NULL!	#NULL!	#NULL!	#NULL!	#NULL!	#NULL!	2	#NULL!	1	3	#NULL!	#NULL!	2	#NULL!	#NULL!	#NULL!	2	1	1	1	2	2	2	1	1	1	1	1	2	2	3	#NULL!	1	2	2	2	0
27	BE	1	20	2	1	1	2	1	2	2	1	2	1	2	2	2	1	2	2	#NULL!	1	2	#NULL!	#NULL!	2	#NULL!	#NULL!	#NULL!	2	1	1	2	2	2	2	3	1	1	1	2	3	3	3	#NULL!	2	2	2	1	0
127	NS	2	19	1	1	2	2	1	2	2	1	1	2	2	2	2	2	2	1	2	1	3	#NULL!	#NULL!	2	#NULL!	#NULL!	#NULL!	2	1	1	1	1	2	1	2	2	2	2	2	2	3	3	#NULL!	2	2	2	1	0
131	NS	2	21	1	1	2	2	1	2	2	1	1	2	2	2	2	2	2	1	2	1	3	#NULL!	#NULL!	2	#NULL!	#NULL!	#NULL!	2	1	1	1	1	2	1	2	2	2	2	2	2	2	3	#NULL!	2	2	2	2	0
175	SS	2	20	2	1	2	1	2	2	2	1	2	1	2	2	2	2	2	2	#NULL!	1	3	#NULL!	#NULL!	2	#NULL!	#NULL!	#NULL!	2	1	1	2	2	2	1	3	1	1	1	1	1	1	3	#NULL!	2	2	2	1	0
57	NS	1	20	1	1	2	2	1	2	2	1	2	2	1	2	2	2	2	1	3	1	1	1	2	2	#NULL!	#NULL!	#NULL!	2	1	2	2	1	2	1	1	1	1	2	1	2	1	3	#NULL!	2	2	2	1	1
112	NS	1	20	2	1	1	1	1	1	2	1	1	1	1	1	1	1	1	1	2	1	1	2	#NULL!	2	#NULL!	#NULL!	#NULL!	2	1	2	2	1	2	3	1	1	1	2	3	1	1	3	#NULL!	2	2	2	1	1
155	AG	1	22	2	1	1	2	2	2	2	1	2	1	1	2	2	1	2	1	2	1	1	1	1	2	#NULL!	#NULL!	#NULL!	2	1	2	2	1	2	1	3	1	1	1	1	1	3	3	#NULL!	2	2	2	2	1
206	SS	1	22	2	1	2	2	2	1	2	1	2	2	1	2	2	2	2	1	2	1	1	1	1	2	#NULL!	#NULL!	#NULL!	2	1	2	2	1	2	1	1	1	1	1	1	1	1	3	#NULL!	2	2	2	2	1
220	AG	1	21	2	1	2	1	2	2	2	1	2	2	1	2	2	2	2	1	1	1	1	1	#NULL!	2	#NULL!	#NULL!	#NULL!	2	1	2	1	2	2	1	2	1	1	1	1	1	2	3	#NULL!	2	2	2	2	1
304	AG	1	30	2	1	1	2	2	1	1	1	1	1	1	1	2	1	2	1	1	1	1	1	2	2	#NULL!	#NULL!	#NULL!	2	1	2	2	1	2	1	3	1	1	1	1	1	3	3	#NULL!	2	2	2	2	1
223	AG	1	20	2	1	2	2	1	2	2	1	2	1	1	1	2	1	2	1	1	1	3	#NULL!	#NULL!	2	#NULL!	#NULL!	#NULL!	2	1	1	2	2	2	1	1	1	1	3	1	1	1	3	#NULL!	2	2	2	1	1
39	BE	1	20	2	1	1	2	2	2	2	2	#NULL!	#NULL!	#NULL!	#NULL!	#NULL!	#NULL!	#NULL!	2	#NULL!	1	1	1	1	2	#NULL!	#NULL!	#NULL!	2	1	1	2	2	2	2	3	1	3	3	3	1	3	3	#NULL!	2	2	2	1	0
22	BE	1	21	2	1	1	1	2	1	1	1	1	1	2	2	2	1	2	1	1	1	1	1	1	2	#NULL!	#NULL!	#NULL!	2	1	1	2	2	2	1	1	1	1	1	1	1	1	3	#NULL!	2	2	2	2	0
67	NS	1	20	1	1	2	2	2	2	1	1	1	2	2	2	2	2	2	1	2	1	1	1	#NULL!	2	#NULL!	#NULL!	#NULL!	2	1	1	2	2	2	2	2	1	1	2	1	2	3	3	#NULL!	2	2	2	1	0
87	NS	2	19	1	1	2	2	2	1	2	1	1	1	2	2	2	2	2	1	3	1	1	2	#NULL!	2	#NULL!	#NULL!	#NULL!	2	1	1	1	1	2	2	1	1	1	1	1	1	1	3	#NULL!	2	2	2	1	0
89	NS	1	27	2	1	2	1	2	2	1	1	1	1	2	2	1	1	2	1	2	1	1	1	#NULL!	2	#NULL!	#NULL!	#NULL!	2	1	1	1	1	2	1	3	1	1	1	1	1	1	3	#NULL!	2	2	2	2	0
202	SS	1	22	2	1	2	2	1	2	2	1	2	1	2	1	2	1	2	1	1	1	1	1	1	2	#NULL!	#NULL!	#NULL!	2	1	1	1	1	2	2	1	1	1	2	1	1	1	3	#NULL!	2	2	2	2	0
312	AG	1	20	2	1	2	2	1	2	2	1	2	1	2	1	2	1	2	1	2	1	1	1	1	2	#NULL!	#NULL!	#NULL!	2	1	1	2	2	2	1	1	1	1	3	1	3	3	3	#NULL!	2	2	2	1	0
80	SS	1	19	1	1	2	2	2	1	2	1	1	1	1	1	2	1	2	1	1	1	1	1	1	2	#NULL!	#NULL!	#NULL!	2	1	1	2	2	2	1	1	1	1	1	1	1	1	3	#NULL!	2	2	2	1	1
95	NS	2	20	2	1	1	1	2	2	2	1	2	1	1	2	2	2	2	1	2	1	1	1	1	2	#NULL!	#NULL!	#NULL!	2	1	1	2	1	2	3	1	1	3	1	1	2	1	3	#NULL!	2	2	2	1	1
119	NS	1	20	1	1	2	2	1	2	2	1	1	1	1	1	1	1	2	1	2	1	1	1	1	2	#NULL!	#NULL!	#NULL!	2	1	1	1	1	2	1	2	1	2	2	2	1	2	3	#NULL!	2	2	2	1	1
152	AG	2	19	1	1	2	1	2	2	2	1	1	1	1	2	2	2	2	1	3	1	1	1	1	2	#NULL!	#NULL!	#NULL!	2	1	1	1	1	2	2	3	1	2	1	2	1	1	3	#NULL!	2	2	2	1	1
163	SS	2	22	2	1	2	2	1	2	2	1	2	2	1	2	2	1	2	1	2	1	1	3	#NULL!	2	#NULL!	#NULL!	#NULL!	2	1	1	2	1	2	2	1	1	1	1	1	2	3	3	#NULL!	2	2	2	2	1
174	SS	2	19	2	1	2	2	1	2	2	1	2	1	1	2	2	1	2	1	2	1	1	3	#NULL!	2	#NULL!	#NULL!	#NULL!	2	1	1	1	2	2	2	2	3	1	1	2	2	3	3	#NULL!	2	2	2	1	1
205	SS	2	19	1	1	1	2	2	2	2	1	2	2	1	2	2	2	2	1	2	1	1	1	1	2	#NULL!	#NULL!	#NULL!	2	1	1	2	2	2	2	2	1	1	1	1	1	1	3	#NULL!	1	2	2	1	1
203	SS	1	22	2	1	2	1	2	2	2	1	1	2	2	2	2	2	2	1	3	1	1	1	#NULL!	2	#NULL!	#NULL!	#NULL!	1	1	1	2	2	2	1	1	1	1	1	1	1	1	3	#NULL!	2	2	2	2	0
221	AG	1	20	2	1	2	1	2	2	2	1	2	1	2	2	2	2	2	1	1	1	1	1	1	2	#NULL!	#NULL!	#NULL!	1	1	1	2	2	2	1	2	1	1	1	1	2	2	3	#NULL!	2	2	2	1	0
315	AG	1	21	2	1	2	1	2	2	2	1	2	2	2	1	2	2	2	1	2	1	2	#NULL!	#NULL!	3	#NULL!	#NULL!	#NULL!	1	1	2	1	2	1	1	1	2	1	2	2	1	1	3	#NULL!	2	1	1	2	0
105	NS	1	20	2	1	2	2	2	2	1	2	#NULL!	#NULL!	#NULL!	#NULL!	#NULL!	#NULL!	#NULL!	1	3	1	2	#NULL!	#NULL!	3	#NULL!	#NULL!	#NULL!	2	1	2	1	2	2	1	3	1	1	2	1	1	1	3	#NULL!	2	2	2	1	0
217	AG	1	20	1	1	2	2	2	2	1	1	1	1	2	2	2	1	2	2	#NULL!	1	3	#NULL!	#NULL!	3	#NULL!	#NULL!	#NULL!	2	1	2	2	1	2	1	1	1	1	1	1	1	1	3	#NULL!	2	2	2	1	0
267	AG	2	19	1	1	2	2	2	1	2	1	2	1	2	2	2	2	2	1	3	1	3	#NULL!	#NULL!	3	#NULL!	#NULL!	#NULL!	2	1	2	2	1	2	1	3	1	1	3	3	1	3	3	#NULL!	2	2	2	1	0
28	BE	2	21	2	1	1	1	1	1	2	1	1	1	1	1	1	1	1	1	1	1	3	#NULL!	#NULL!	3	#NULL!	#NULL!	#NULL!	2	1	2	1	2	#NULL!	1	1	1	1	1	1	1	3	3	#NULL!	2	2	2	2	1
126	NS	2	19	1	1	2	1	2	2	2	1	2	2	1	2	2	2	2	2	#NULL!	1	2	#NULL!	#NULL!	3	#NULL!	#NULL!	#NULL!	2	1	2	1	2	2	3	3	3	3	3	3	3	3	3	#NULL!	2	2	2	1	1
268	AG	2	20	1	1	2	1	2	2	2	2	#NULL!	#NULL!	#NULL!	#NULL!	#NULL!	#NULL!	#NULL!	2	#NULL!	1	1	1	1	3	#NULL!	#NULL!	#NULL!	2	1	2	2	1	2	2	2	1	1	3	3	3	2	3	#NULL!	2	2	2	1	0
269	AG	2	19	1	1	2	2	2	2	1	2	#NULL!	#NULL!	#NULL!	#NULL!	#NULL!	#NULL!	#NULL!	2	#NULL!	1	1	1	1	3	#NULL!	#NULL!	#NULL!	2	1	2	2	1	2	1	2	1	1	3	3	1	3	3	#NULL!	2	2	2	1	0
271	AG	2	20	2	1	2	2	2	1	2	2	#NULL!	#NULL!	#NULL!	#NULL!	#NULL!	#NULL!	#NULL!	2	#NULL!	1	1	1	1	3	#NULL!	#NULL!	#NULL!	2	1	2	2	1	2	1	3	1	1	2	3	2	3	3	#NULL!	2	2	2	1	0
118	NS	2	21	2	1	2	2	2	1	2	1	1	2	2	2	2	2	2	1	1	1	1	1	1	3	#NULL!	#NULL!	#NULL!	2	1	2	2	1	2	1	2	1	1	3	3	1	3	3	#NULL!	2	2	2	2	0
270	AG	2	19	2	1	2	2	2	2	1	1	2	2	2	2	2	1	2	2	#NULL!	1	1	1	1	3	#NULL!	#NULL!	#NULL!	2	1	2	2	1	2	3	3	1	1	3	3	1	3	3	#NULL!	2	2	2	1	0
98	NS	1	19	2	1	2	2	1	2	2	2	#NULL!	#NULL!	#NULL!	#NULL!	#NULL!	#NULL!	#NULL!	2	#NULL!	2	#NULL!	#NULL!	#NULL!	3	#NULL!	#NULL!	#NULL!	2	1	1	2	2	2	1	3	1	1	1	3	1	3	3	#NULL!	2	2	2	1	0
278	SS	2	20	1	1	2	1	2	2	2	2	#NULL!	#NULL!	#NULL!	#NULL!	#NULL!	#NULL!	#NULL!	2	#NULL!	1	3	#NULL!	#NULL!	3	#NULL!	#NULL!	#NULL!	2	1	1	2	1	2	3	1	1	1	1	1	3	3	3	#NULL!	2	2	2	1	0
35	BE	1	23	2	1	2	2	1	2	2	1	2	2	2	1	2	2	2	1	1	1	2	#NULL!	#NULL!	3	#NULL!	#NULL!	#NULL!	2	1	1	2	2	2	2	1	2	2	1	2	2	1	3	#NULL!	2	2	2	2	0
71	NS	2	20	2	1	1	1	1	1	2	1	1	1	1	1	1	2	2	1	1	1	2	#NULL!	#NULL!	3	#NULL!	#NULL!	#NULL!	1	1	2	1	2	2	1	1	3	3	3	3	3	3	3	#NULL!	2	2	2	1	1
172	SS	1	23	1	1	1	1	1	1	2	1	1	1	1	1	2	2	2	1	1	1	2	#NULL!	#NULL!	3	#NULL!	#NULL!	#NULL!	1	1	2	1	2	2	1	1	1	1	1	1	1	1	3	#NULL!	2	2	2	2	1
226	AG	1	28	2	1	2	1	1	1	1	1	1	1	1	1	1	2	2	1	1	1	3	#NULL!	#NULL!	3	#NULL!	#NULL!	#NULL!	1	1	2	1	2	2	1	1	1	1	1	1	1	1	3	#NULL!	2	2	2	2	1
130	NS	2	20	1	1	2	2	1	2	2	1	1	1	1	2	2	2	2	1	2	1	3	#NULL!	#NULL!	3	#NULL!	#NULL!	#NULL!	2	1	1	1	1	2	1	2	2	2	2	2	2	2	3	#NULL!	2	2	2	1	1
149	AG	2	19	1	1	2	1	2	2	2	1	1	1	2	2	2	1	2	1	2	1	1	1	1	3	#NULL!	#NULL!	#NULL!	2	1	1	1	1	2	2	3	1	1	3	2	3	3	3	#NULL!	2	2	2	1	0
277	AG	2	20	2	1	2	1	2	2	2	2	#NULL!	#NULL!	#NULL!	#NULL!	#NULL!	#NULL!	#NULL!	2	#NULL!	1	3	#NULL!	#NULL!	3	#NULL!	#NULL!	#NULL!	1	1	1	2	1	2	3	1	1	1	1	1	3	3	3	#NULL!	2	2	2	1	0
280	AG	2	20	2	1	2	1	2	2	2	2	#NULL!	#NULL!	#NULL!	#NULL!	#NULL!	#NULL!	#NULL!	2	#NULL!	1	3	#NULL!	#NULL!	3	#NULL!	#NULL!	#NULL!	1	1	1	2	1	2	3	1	1	1	1	1	3	3	3	#NULL!	2	2	2	1	0
281	AG	2	22	2	1	1	1	2	2	2	2	#NULL!	#NULL!	#NULL!	#NULL!	#NULL!	#NULL!	#NULL!	2	#NULL!	1	3	#NULL!	#NULL!	3	#NULL!	#NULL!	#NULL!	1	1	1	2	1	2	2	1	1	1	1	3	3	3	3	#NULL!	2	2	2	2	0
279	AG	2	20	2	1	2	1	2	2	2	1	1	1	2	2	2	2	2	1	2	1	3	#NULL!	#NULL!	3	#NULL!	#NULL!	#NULL!	1	1	1	1	2	2	3	3	1	1	3	3	3	3	3	#NULL!	2	2	2	1	0
239	AG	1	21	2	1	2	2	1	2	2	1	2	2	1	2	2	2	2	2	#NULL!	1	1	1	#NULL!	3	#NULL!	#NULL!	#NULL!	2	1	1	2	2	2	3	1	1	1	1	1	1	3	3	#NULL!	2	2	2	2	1
286	AG	2	20	2	1	2	1	2	2	2	1	2	2	1	2	2	1	2	1	3	1	1	1	2	3	#NULL!	#NULL!	#NULL!	2	1	1	2	2	2	1	3	1	1	1	1	1	2	3	#NULL!	2	2	2	1	1
287	AG	2	20	2	1	2	1	2	2	2	1	2	1	1	2	2	2	2	1	3	1	1	1	2	3	#NULL!	#NULL!	#NULL!	2	1	1	2	2	2	1	3	1	1	1	1	1	3	3	#NULL!	2	2	2	1	1
90	NS	1	25	1	1	1	1	2	2	2	1	2	1	1	2	2	2	2	1	1	1	3	#NULL!	#NULL!	3	#NULL!	#NULL!	#NULL!	1	1	1	2	2	2	1	1	1	1	1	1	1	1	3	#NULL!	2	2	2	2	1
235	AG	1	20	2	1	1	2	2	2	2	2	#NULL!	#NULL!	#NULL!	#NULL!	#NULL!	#NULL!	#NULL!	2	#NULL!	1	1	1	1	3	#NULL!	#NULL!	#NULL!	1	1	1	2	2	2	1	3	1	1	1	1	2	2	3	#NULL!	2	2	2	1	0
262	AG	2	19	2	1	2	2	1	2	2	2	#NULL!	#NULL!	#NULL!	#NULL!	#NULL!	#NULL!	#NULL!	2	#NULL!	1	1	3	#NULL!	3	#NULL!	#NULL!	#NULL!	1	1	1	1	1	2	1	1	2	2	3	1	2	3	3	#NULL!	2	2	2	1	0
263	AG	2	19	2	1	2	2	1	2	2	2	#NULL!	#NULL!	#NULL!	#NULL!	#NULL!	#NULL!	#NULL!	2	#NULL!	1	1	3	#NULL!	3	#NULL!	#NULL!	#NULL!	1	1	1	1	1	2	1	1	1	1	2	1	2	1	3	#NULL!	2	2	2	1	0
53	BE	1	20	2	1	2	2	1	2	2	2	#NULL!	#NULL!	#NULL!	#NULL!	#NULL!	#NULL!	#NULL!	2	#NULL!	2	#NULL!	#NULL!	#NULL!	2	#NULL!	#NULL!	#NULL!	2	2	#NULL!	#NULL!	#NULL!	#NULL!	2	3	1	1	3	3	2	3	3	#NULL!	2	2	2	1	0
173	SS	2	20	2	1	2	2	1	2	2	1	2	2	2	1	2	2	2	2	#NULL!	2	#NULL!	#NULL!	#NULL!	2	#NULL!	#NULL!	#NULL!	2	2	#NULL!	#NULL!	#NULL!	#NULL!	2	3	1	2	1	1	2	2	3	#NULL!	1	2	2	1	0
309	AG	1	21	2	1	2	1	2	2	2	1	2	2	2	2	2	1	2	2	#NULL!	2	#NULL!	#NULL!	#NULL!	2	#NULL!	#NULL!	#NULL!	2	2	#NULL!	#NULL!	#NULL!	#NULL!	2	2	2	2	2	1	2	2	3	#NULL!	2	2	2	2	0
59	NS	1	21	2	1	2	2	1	2	2	1	1	1	1	1	2	1	2	1	1	1	2	#NULL!	#NULL!	2	#NULL!	#NULL!	#NULL!	2	2	#NULL!	#NULL!	#NULL!	#NULL!	2	1	1	1	2	1	1	1	3	#NULL!	2	2	2	2	1
129	NS	2	20	1	1	2	1	2	2	2	2	#NULL!	#NULL!	#NULL!	#NULL!	#NULL!	#NULL!	#NULL!	2	#NULL!	1	1	2	#NULL!	2	#NULL!	#NULL!	#NULL!	2	2	#NULL!	#NULL!	#NULL!	#NULL!	2	1	2	2	2	2	2	2	3	#NULL!	2	2	2	1	0
72	NS	2	20	2	1	2	1	2	2	2	1	2	2	2	1	2	1	2	1	1	1	1	3	#NULL!	2	#NULL!	#NULL!	#NULL!	2	2	#NULL!	#NULL!	#NULL!	#NULL!	3	2	1	1	1	3	1	3	3	#NULL!	2	2	2	1	0
160	SS	1	20	2	1	2	2	2	2	1	1	1	2	2	2	2	2	2	2	#NULL!	1	2	#NULL!	#NULL!	3	#NULL!	#NULL!	#NULL!	2	2	#NULL!	#NULL!	#NULL!	#NULL!	2	2	3	1	2	2	3	3	3	#NULL!	2	2	2	1	0
162	SS	1	20	2	1	2	1	2	2	2	2	#NULL!	#NULL!	#NULL!	#NULL!	#NULL!	#NULL!	#NULL!	2	#NULL!	1	1	1	1	3	#NULL!	#NULL!	#NULL!	2	2	#NULL!	#NULL!	#NULL!	#NULL!	1	1	2	1	1	1	1	1	3	#NULL!	2	2	2	1	0
266	AG	2	21	1	1	2	2	2	2	1	1	2	2	2	2	2	1	2	2	#NULL!	1	3	#NULL!	#NULL!	3	#NULL!	#NULL!	#NULL!	1	2	#NULL!	#NULL!	#NULL!	#NULL!	2	1	3	2	1	1	1	1	3	#NULL!	2	2	2	2	0
196	SS	2	22	1	1	2	1	2	2	2	1	2	2	2	2	2	2	1	2	#NULL!	2	#NULL!	#NULL!	#NULL!	3	#NULL!	#NULL!	#NULL!	1	2	#NULL!	#NULL!	#NULL!	#NULL!	2	2	1	2	1	2	2	2	3	#NULL!	2	2	2	2	1
34	BE	1	22	2	1	2	2	1	2	2	2	#NULL!	#NULL!	#NULL!	#NULL!	#NULL!	#NULL!	#NULL!	2	#NULL!	2	#NULL!	#NULL!	#NULL!	2	#NULL!	#NULL!	#NULL!	2	3	#NULL!	#NULL!	#NULL!	#NULL!	3	3	2	2	1	2	1	2	3	#NULL!	2	2	2	2	0
209	SS	1	24	2	1	2	1	2	2	2	1	1	1	2	2	2	2	2	2	#NULL!	2	#NULL!	#NULL!	#NULL!	2	#NULL!	#NULL!	#NULL!	2	3	#NULL!	#NULL!	#NULL!	#NULL!	1	1	1	1	1	1	1	1	3	#NULL!	2	2	2	2	0
238	AG	1	21	2	1	2	2	1	2	2	1	1	2	2	2	2	2	2	2	#NULL!	2	#NULL!	#NULL!	#NULL!	2	#NULL!	#NULL!	#NULL!	2	3	#NULL!	#NULL!	#NULL!	#NULL!	3	3	3	1	1	3	1	3	3	#NULL!	1	2	2	2	0
96	NS	1	21	2	1	1	2	2	2	2	1	1	1	2	2	2	1	2	2	#NULL!	1	3	#NULL!	#NULL!	2	#NULL!	#NULL!	#NULL!	2	3	#NULL!	#NULL!	#NULL!	#NULL!	3	1	1	3	3	3	3	3	3	#NULL!	2	2	2	2	0
257	AG	2	19	2	1	2	2	1	2	2	1	1	2	2	2	2	2	2	1	1	1	3	#NULL!	#NULL!	2	#NULL!	#NULL!	#NULL!	2	3	#NULL!	#NULL!	#NULL!	#NULL!	3	3	3	3	3	2	3	3	3	#NULL!	2	2	2	1	0
296	AG	2	20	1	1	2	2	2	2	1	1	1	2	2	2	2	2	2	1	1	1	3	#NULL!	#NULL!	2	#NULL!	#NULL!	#NULL!	2	3	#NULL!	#NULL!	#NULL!	#NULL!	3	3	3	3	3	3	3	3	3	#NULL!	1	2	2	1	0
186	SS	1	21	1	1	1	2	2	2	2	1	2	2	1	2	2	2	2	2	#NULL!	2	#NULL!	#NULL!	#NULL!	2	#NULL!	#NULL!	#NULL!	2	3	#NULL!	#NULL!	#NULL!	#NULL!	3	3	3	3	3	3	3	3	3	#NULL!	2	2	2	2	1
43	BE	2	19	1	1	2	2	2	1	2	1	2	2	1	1	2	1	2	1	2	1	3	#NULL!	#NULL!	2	#NULL!	#NULL!	#NULL!	2	3	#NULL!	#NULL!	#NULL!	#NULL!	2	2	1	1	1	1	1	2	3	#NULL!	2	2	2	1	1
75	NS	2	19	1	1	2	1	2	2	2	1	1	2	1	2	2	2	1	1	2	1	3	#NULL!	#NULL!	2	#NULL!	#NULL!	#NULL!	2	3	#NULL!	#NULL!	#NULL!	#NULL!	3	3	3	3	3	3	3	3	3	#NULL!	1	2	2	1	1
153	AG	1	21	2	1	1	2	2	2	2	1	2	2	1	2	2	2	2	2	#NULL!	1	3	#NULL!	#NULL!	2	#NULL!	#NULL!	#NULL!	2	3	#NULL!	#NULL!	#NULL!	#NULL!	2	1	3	3	3	2	2	3	3	#NULL!	2	2	2	2	1
298	AG	2	19	1	1	1	2	2	2	2	1	1	2	1	2	2	2	1	1	1	1	3	#NULL!	#NULL!	2	#NULL!	#NULL!	#NULL!	2	3	#NULL!	#NULL!	#NULL!	#NULL!	3	3	3	3	3	3	3	3	3	#NULL!	1	2	2	1	1
299	AG	2	19	1	1	1	2	2	2	2	1	1	2	1	2	2	2	1	1	1	1	3	#NULL!	#NULL!	2	#NULL!	#NULL!	#NULL!	2	3	#NULL!	#NULL!	#NULL!	#NULL!	3	3	3	3	3	3	3	3	3	#NULL!	1	2	2	1	1
93	NS	1	20	2	1	2	1	2	2	1	1	1	1	2	2	1	1	2	1	3	1	1	1	1	2	#NULL!	#NULL!	#NULL!	2	3	#NULL!	#NULL!	#NULL!	#NULL!	3	3	3	3	3	3	3	3	3	#NULL!	2	2	2	1	0
9	BE	1	21	1	1	1	2	2	2	2	2	#NULL!	#NULL!	#NULL!	#NULL!	#NULL!	#NULL!	#NULL!	2	#NULL!	2	#NULL!	#NULL!	#NULL!	3	#NULL!	#NULL!	#NULL!	2	3	#NULL!	#NULL!	#NULL!	#NULL!	3	3	3	3	3	3	3	3	3	#NULL!	2	2	2	2	0
10	BE	1	20	1	1	1	2	2	2	2	2	#NULL!	#NULL!	#NULL!	#NULL!	#NULL!	#NULL!	#NULL!	2	#NULL!	2	#NULL!	#NULL!	#NULL!	3	#NULL!	#NULL!	#NULL!	2	3	#NULL!	#NULL!	#NULL!	#NULL!	3	3	3	3	3	3	3	3	3	#NULL!	2	2	2	1	0
60	NS	1	20	2	1	2	2	1	2	2	2	#NULL!	#NULL!	#NULL!	#NULL!	#NULL!	#NULL!	#NULL!	2	#NULL!	2	#NULL!	#NULL!	#NULL!	3	#NULL!	#NULL!	#NULL!	2	3	#NULL!	#NULL!	#NULL!	#NULL!	3	3	3	3	3	3	3	2	3	#NULL!	2	2	2	1	0
115	NS	2	19	2	1	2	2	1	2	2	2	#NULL!	#NULL!	#NULL!	#NULL!	#NULL!	#NULL!	#NULL!	1	2	2	#NULL!	#NULL!	#NULL!	3	#NULL!	#NULL!	#NULL!	2	3	#NULL!	#NULL!	#NULL!	#NULL!	3	3	3	3	3	3	3	3	3	#NULL!	2	2	2	1	0
139	AG	1	19	1	1	2	1	2	2	2	2	#NULL!	#NULL!	#NULL!	#NULL!	#NULL!	#NULL!	#NULL!	2	#NULL!	2	#NULL!	#NULL!	#NULL!	3	#NULL!	#NULL!	#NULL!	2	3	#NULL!	#NULL!	#NULL!	#NULL!	1	2	2	2	2	1	2	1	3	#NULL!	2	2	2	1	0
290	AG	1	20	1	1	1	2	2	2	2	2	#NULL!	#NULL!	#NULL!	#NULL!	#NULL!	#NULL!	#NULL!	2	#NULL!	2	#NULL!	#NULL!	#NULL!	3	#NULL!	#NULL!	#NULL!	2	3	#NULL!	#NULL!	#NULL!	#NULL!	3	3	3	3	3	3	3	3	3	#NULL!	2	2	2	1	0
37	BE	1	20	2	1	1	1	2	2	2	1	2	2	2	1	2	2	2	1	2	2	#NULL!	#NULL!	#NULL!	3	#NULL!	#NULL!	#NULL!	2	3	#NULL!	#NULL!	#NULL!	#NULL!	2	3	1	1	1	1	1	3	3	#NULL!	2	2	2	1	0
114	NS	2	20	1	1	2	2	2	1	2	1	1	2	2	2	2	2	2	1	2	2	#NULL!	#NULL!	#NULL!	3	#NULL!	#NULL!	#NULL!	2	3	#NULL!	#NULL!	#NULL!	#NULL!	3	3	3	3	3	3	3	3	3	#NULL!	2	2	2	1	0
2	BE	2	20	1	1	1	2	2	2	2	2	#NULL!	#NULL!	#NULL!	#NULL!	#NULL!	#NULL!	#NULL!	1	2	1	3	#NULL!	#NULL!	3	#NULL!	#NULL!	#NULL!	2	3	#NULL!	#NULL!	#NULL!	#NULL!	2	3	2	3	2	3	2	3	3	#NULL!	2	2	2	1	0
4	BE	2	20	1	1	2	2	2	1	2	1	2	1	2	1	2	1	2	2	#NULL!	1	2	#NULL!	#NULL!	3	#NULL!	#NULL!	#NULL!	2	3	#NULL!	#NULL!	#NULL!	#NULL!	1	3	1	1	1	2	3	1	3	#NULL!	2	2	2	1	0
6	BE	2	20	1	1	2	2	2	2	2	1	2	2	2	1	2	2	2	2	#NULL!	1	2	#NULL!	#NULL!	3	#NULL!	#NULL!	#NULL!	2	3	#NULL!	#NULL!	#NULL!	#NULL!	1	3	1	1	1	2	3	1	3	#NULL!	2	2	2	1	0
275	AG	2	20	2	1	2	2	2	1	2	1	2	1	2	1	2	1	2	2	#NULL!	1	2	#NULL!	#NULL!	3	#NULL!	#NULL!	#NULL!	2	3	#NULL!	#NULL!	#NULL!	#NULL!	1	3	1	1	1	2	3	1	3	#NULL!	2	2	2	1	0
8	BE	1	21	1	1	2	2	1	2	2	1	2	2	1	2	2	2	2	2	#NULL!	2	#NULL!	#NULL!	#NULL!	3	#NULL!	#NULL!	#NULL!	2	3	#NULL!	#NULL!	#NULL!	#NULL!	3	3	3	3	3	3	3	3	3	#NULL!	2	2	2	2	1
63	NS	2	19	1	1	2	2	2	2	1	1	1	2	1	1	2	1	2	2	#NULL!	2	#NULL!	#NULL!	#NULL!	3	#NULL!	#NULL!	#NULL!	2	3	#NULL!	#NULL!	#NULL!	#NULL!	1	1	1	1	1	1	1	1	3	#NULL!	2	2	2	1	1
218	AG	1	22	2	1	1	1	1	1	1	1	1	1	1	1	1	1	2	2	#NULL!	2	#NULL!	#NULL!	#NULL!	3	#NULL!	#NULL!	#NULL!	2	3	#NULL!	#NULL!	#NULL!	#NULL!	1	3	3	3	3	3	2	3	3	#NULL!	2	2	2	2	1
224	AG	1	23	2	1	2	2	1	2	2	1	1	1	1	1	2	2	2	2	#NULL!	2	#NULL!	#NULL!	#NULL!	3	#NULL!	#NULL!	#NULL!	2	3	#NULL!	#NULL!	#NULL!	#NULL!	1	1	1	1	1	1	1	3	3	#NULL!	2	2	2	2	1
70	NS	2	22	2	1	1	1	2	1	1	1	1	1	1	2	1	1	2	1	2	1	3	#NULL!	#NULL!	3	#NULL!	#NULL!	#NULL!	2	3	#NULL!	#NULL!	#NULL!	#NULL!	1	1	3	3	3	3	3	3	3	#NULL!	2	2	2	2	1
76	NS	2	19	1	1	1	1	2	2	2	1	1	2	1	2	2	2	2	1	2	1	3	#NULL!	#NULL!	3	#NULL!	#NULL!	#NULL!	2	3	#NULL!	#NULL!	#NULL!	#NULL!	2	1	2	3	3	2	3	3	3	#NULL!	1	2	2	1	1
248	AG	1	21	1	1	1	1	1	2	2	1	1	1	1	2	2	1	2	2	#NULL!	1	3	#NULL!	#NULL!	3	#NULL!	#NULL!	#NULL!	2	3	#NULL!	#NULL!	#NULL!	#NULL!	2	3	3	1	3	3	3	3	3	#NULL!	2	2	2	2	1
274	AG	2	20	2	1	2	2	1	2	2	1	2	1	1	1	2	1	2	2	#NULL!	1	3	#NULL!	#NULL!	3	#NULL!	#NULL!	#NULL!	2	3	#NULL!	#NULL!	#NULL!	#NULL!	3	3	1	1	3	3	3	3	3	#NULL!	2	2	2	1	1
136	AG	1	22	2	1	2	1	1	1	1	1	1	1	1	1	1	1	2	1	1	1	1	3	#NULL!	3	#NULL!	#NULL!	#NULL!	2	3	#NULL!	#NULL!	#NULL!	#NULL!	1	2	2	2	1	1	2	3	3	#NULL!	2	2	2	2	1
41	BE	1	20	2	1	2	1	2	2	2	2	#NULL!	#NULL!	#NULL!	#NULL!	#NULL!	#NULL!	#NULL!	2	#NULL!	2	#NULL!	#NULL!	#NULL!	1	2	#NULL!	#NULL!	2	1	2	2	1	2	3	2	3	1	2	1	2	2	3	#NULL!	2	2	2	1	0
148	AG	1	20	2	1	1	1	2	2	2	1	1	1	1	2	2	2	2	1	2	1	1	1	1	1	4	#NULL!	#NULL!	1	1	1	2	2	2	1	1	1	1	1	1	1	1	3	#NULL!	2	2	2	1	1
230	AG	1	21	2	1	2	2	1	2	2	1	2	1	2	2	2	2	2	1	2	1	1	1	1	1	5	#NULL!	#NULL!	2	1	2	1	2	2	2	1	1	1	1	1	1	1	3	#NULL!	1	2	2	2	0
133	NS	1	20	2	1	2	1	2	2	2	1	1	2	2	2	2	2	2	1	2	1	1	1	1	1	5	#NULL!	#NULL!	1	1	2	2	1	2	1	1	1	1	1	1	1	1	3	#NULL!	1	2	2	1	0
255	AG	2	20	2	1	1	2	2	2	2	2	#NULL!	#NULL!	#NULL!	#NULL!	#NULL!	#NULL!	#NULL!	1	1	1	1	2	#NULL!	1	5	#NULL!	#NULL!	2	1	1	2	2	2	3	3	3	3	3	3	3	3	3	#NULL!	2	2	2	1	0
66	NS	2	20	2	1	2	2	1	2	2	1	2	2	2	2	2	1	2	1	2	1	1	2	#NULL!	1	6	#NULL!	#NULL!	1	1	2	1	2	2	1	1	1	1	1	1	1	3	3	#NULL!	2	2	2	1	0
97	NS	1	20	2	1	1	2	2	2	2	2	#NULL!	#NULL!	#NULL!	#NULL!	#NULL!	#NULL!	#NULL!	2	#NULL!	2	#NULL!	#NULL!	#NULL!	1	6	#NULL!	#NULL!	2	2	#NULL!	#NULL!	#NULL!	#NULL!	1	1	1	1	3	3	3	2	3	#NULL!	1	2	2	1	0
12	BE	1	21	1	1	2	1	2	2	2	1	2	2	1	2	2	2	2	2	#NULL!	1	3	#NULL!	#NULL!	1	6	#NULL!	#NULL!	1	3	#NULL!	#NULL!	#NULL!	#NULL!	1	2	1	1	3	2	2	2	3	#NULL!	2	2	2	2	1
[truncated: 20 more columns]
